# Supplementary material for: Effect of a multispecies probiotic on reducing the incidence of antibiotic-associated diarrhoea in children: a protocol for a randomised controlled trial
Source: PubMed Central journal article supplement — BMJ Open. 2018 Jun 4;8(5):e021214. doi: 10.1136/bmjopen-2017-021214 (PMC5988056; doi:10.1136/bmjopen-2017-021214), 2018-06-04
Supplement: bmjopen-2017-021214.draft_revisions.pdf [file bmjopen-2017-021214.draft_revisions.pdf]

# BMJ Open

BMJ Open is committed to open peer review. As part of this commitment we make the peer review history of every article we publish publicly available.

When an article is published we post the peer reviewers' comments and the authors' responses online. We also post the versions of the paper that were used during peer review. These are the versions that the peer review comments apply to.

The versions of the paper that follow are the versions that were submitted during the peer review process. They are not the versions of record or the final published versions. They should not be cited or distributed as the published version of this manuscript.

BMJ Open is an open access journal and the full, final, typeset and author-corrected version of record of the manuscript is available on our site with no access controls, subscription charges or pay-per-view fees (<http://bmjopen.bmj.com>).

If you have any questions on BMJ Open's open peer review process please email [info.bmjopen@bmj.com](mailto:info.bmjopen@bmj.com)

# BMJ Open

## The effect of a multispecies probiotic on reducing the incidence of antibiotic-associated diarrhoea in children: a protocol for a randomised controlled trial

|                               |                                                                                                                                                               |
|-------------------------------|---------------------------------------------------------------------------------------------------------------------------------------------------------------|
| Journal:                      | <i>BMJ Open</i>                                                                                                                                               |
| Manuscript ID                 | bmjopen-2017-021214                                                                                                                                           |
| Article Type:                 | Protocol                                                                                                                                                      |
| Date Submitted by the Author: | 15-Dec-2017                                                                                                                                                   |
| Complete List of Authors:     | Łukasik, Jan; The Medical University of Warsaw, Department of Paediatrics<br>SZAJEWSKA, Hania; The Medical University of Warsaw, Department of<br>Paediatrics |
| Keywords:                     | probiotics, antibiotics, diarrhoea, RCT                                                                                                                       |
|                               |                                                                                                                                                               |

SCHOLARONE™  
Manuscripts

Review only

1  
2  
3 **The effect of a multispecies probiotic on reducing the incidence of antibiotic-**  
4 **associated diarrhoea in children: a protocol for a randomised controlled trial**  
5  
6

7 Jan Łukasik, Hania Szajewska  
8  
9

10 Department of Paediatrics, The Medical University of Warsaw, Poland  
11  
12  
13

14 **Corresponding author:**

15 Prof. Hania Szajewska, MD

16 Department of Paediatrics, The Medical University of Warsaw

17 Żwirki i Wigury 63A, 02-091 Warsaw, Poland,

18 email: hania@ipgate.pl  
19  
20  
21  
22  
23

24 **Date and protocol version identifier:** 14/10/2017  
25  
26

27 **Key words:** probiotics, antibiotics, diarrhoea, RCT  
28  
29

30 **Word count:** 3551

31 **Number of tables:** 1

32 **Number of references:** 27  
33  
34  
35  
36  
37  
38  
39  
40  
41  
42  
43  
44  
45  
46  
47  
48  
49  
50  
51  
52  
53  
54  
55  
56  
57  
58  
59  
60

## ABSTRACT

### Introduction

Certain individual probiotic strains have been proven to be effective in reducing the risk of antibiotic-associated diarrhoea (AAD). However, the effects of using multispecies probiotics remain unclear. We aim to assess the effectiveness of a specific multispecies probiotic preparation (Ecologic AAD Kids) in reducing the incidence of AAD in children.

### Methods and analysis

A total of 350 children aged 6 months to 18 years, undergoing antibiotic treatment, will be randomly allocated to receive either a multispecies probiotic consisting of 2 strains of *Bifidobacterium* (*B. bifidum* W23, *B. lactis* W51) and 6 strains of *Lactobacillus* (*L. acidophilus* W37, *L. acidophilus* W55, *L. paracasei* W20, *L. plantarum* W62, *L. rhamnosus* W71, and *L. salivarius* W24) at a total dose of  $10^{10}$  colony-forming units daily, or a placebo, from the first day of antibiotic treatment until 7 days after antibiotic cessation. The primary outcome measure will be the incidence of AAD, defined as  $\geq 3$  loose or watery stools (a score of A on the Amsterdam Infant Stool Scale for children younger than 1 year and a score of 5-7 on the Bristol Stool Form scale for children older than 1 year) in 24 hours, caused either by *Clostridium difficile* or of otherwise unexplained aetiology (after testing for common diarrhoeal pathogens), occurring during and/or up to 7 days after the end of the antibiotic therapy.

### Ethics and dissemination

The study protocol is approved by the Ethics Committee of the Medical University of Warsaw. The findings will be published in a peer-reviewed journal and submitted to relevant conferences.

### Trial registration

The trial is registered at [clinicaltrials.gov](http://clinicaltrials.gov), trial identifier: NCT03334604 Any important changes in the protocol will be implemented there.

## STRENGTHS AND LIMITATIONS OF THIS STUDY

- This study is designed to answer a precise and unambiguous clinical question.
- To ensure methodological correctness, the study protocol will follow the rules included in the SPIRIT statement.
- Considering that no multispecies probiotics are currently recommended for reducing the incidence of antibiotic-associated diarrhoea (AAD), this trial may contribute to the development of future guidelines.
- The incidence of AAD in specific populations is difficult to predict and may turn out to be lower than expected, limiting trial's statistical power.
- Since AAD may occur up to 8 weeks after antibiotic treatment, some cases may be missed in this study.

## INTRODUCTION

Antibiotics are well known to cause disturbances in the composition of the intestinal microbiota, leading to the development of gastrointestinal (GI) symptoms.<sup>1</sup> Antibiotic-associated diarrhoea (AAD), which may be defined as diarrhoea that occurs in relation to antibiotic treatment with the exclusion of other aetiologies, is a common complication of antibiotic use in children.<sup>2</sup> Based on the analysis of data from randomised controlled trials (RCTs) the pooled incidence of AAD in children was 19%.<sup>3</sup> However, the incidence varies greatly from study to study, ranging from 2.1%<sup>4</sup> to 80%<sup>5</sup>, depending on factors such as the adopted definition of diarrhoea, the study population, and the type of antibiotic treatment.<sup>6</sup> The underlying mechanism of AAD is not fully understood. It may be caused by a specific enteric pathogen (e.g., *Clostridium difficile*, *Clostridium perfringens*, *Staphylococcus aureus*, or *Candida albicans*), metabolic consequences of altered intestinal microbiota, or a direct effect of antibiotics on the mucosa.<sup>7</sup> AAD may vary both in severity (from uncomplicated diarrhoea to pseudomembranous colitis) and in incubation period (from the first day of antibiotic treatment to 8 weeks after discontinuation).<sup>8</sup>

The impact of antimicrobial drugs on commensal microorganisms of the gut justifies the idea of using probiotics to reduce the incidence of AAD. Probiotics are live microorganisms that, when administered in adequate amounts, confer a health benefit on the host.<sup>9</sup> There are a number of potential mechanisms of their action, including activity in the intestinal lumen (e.g., competition with, or direct suppression of, pathogenic microorganisms), interaction with the mucosal barrier (e.g., up-regulation of tight junctions, modulation of water and ion channels), and influence on the intestinal immune system.<sup>10</sup>

Probiotic properties are species- and strain-specific, so each strain or their combinations should be examined separately.<sup>2 11</sup> In children, 2 probiotic strains with proven efficacy in the prevention of AAD are *Lactobacillus rhamnosus* GG and *Saccharomyces boulardii*.<sup>12 13</sup> Both are currently recommended to reduce the incidence of AAD in children, if the use of probiotics is considered.<sup>2</sup> Probiotic preparations consisting of more than one strain are not yet recommended for reducing the incidence of AAD in children, despite some evidence of their effectiveness.<sup>3 14</sup>

1  
2  
3  
4 In this trial, a preparation consisting of 8 probiotic strains (Ecologic<sup>®</sup> AAD kids,  
5 Winclove Probiotics, the Netherlands), including 2 strains of Bifidobacterium  
6 (*Bifidobacterium bifidum* W23, *Bifidobacterium lactis* W51) and 6 strains of  
7 Lactobacillus (*Lactobacillus acidophilus* W37, *Lactobacillus acidophilus* W55,  
8 *Lactobacillus paracasei* W20, *Lactobacillus plantarum* W62, *Lactobacillus rhamnosus*  
9 W71, and *Lactobacillus salivarius* W24) will be used. Hereafter, this probiotic strain  
10 combination is referred to as 'multispecies probiotic' (MP). None of the individual  
11 strains included in MP have been proven to be effective in reducing the incidence of  
12 AAD. However, studies on the effectiveness of a comparable preparation, Ecologic  
13 AAD, in reducing diarrhoeal symptoms have been performed. The aforementioned  
14 preparation has a similar composition to MP; however, it additionally contains  
15 *Enterococcus faecium* W54. The species *E. faecium* is not recommended for use in  
16 children by ESPGHAN due to unclear safety issues<sup>15</sup> and, therefore, is excluded from  
17 the current formulation. In one RCT conducted in 41 healthy adult volunteers  
18 receiving amoxicillin with either Ecologic AAD or placebo, subjects in the  
19 experimental group had a significantly lower rate of diarrhoea-like bowel movements  
20 compared with those in the placebo group (48% vs. 79%, respectively, RR=0.61,  
21 p<0.05).<sup>16</sup> Another RCT conducted in 45 adult patients with a chronic obstructive  
22 pulmonary disease exacerbation who were treated with antibiotics did not reveal a  
23 difference in the rate of diarrhoea-like bowel movements between the Ecologic AAD  
24 and placebo groups (77% vs. 70%, respectively, RR=1.1, p>0.05).<sup>17</sup> However, this  
25 study was carried out in a very specific group of patients, i.e., those with a history of  
26 frequent and prolonged antibiotic use. So far, there have been no RCTs using this  
27 probiotic preparation carried out in larger groups of participants or in children.  
28  
29  
30  
31  
32  
33  
34  
35  
36  
37  
38  
39  
40  
41  
42  
43  
44

## 45 **METHODS AND ANALYSIS**

### 46 **Aim**

47 To assess the efficacy and safety of using MP to reduce the incidence of AAD in  
48 children requiring antibiotic treatment.  
49  
50  
51  
52

### 53 **Trial design**

54 The study is a randomised, double-blind, placebo-controlled, parallel group trial with  
55 an allocation ratio of 1:1.  
56  
57  
58  
59  
60

## Study setting

Participants in this study will be recruited among patients of the Department of Paediatrics of the Medical University of Warsaw, Poland. In case of a low recruitment rate (defined as described in the 'Monitoring' section of this document), other hospitals and medical care centres would also be plausible sources of participants, providing the presence of adequately trained personnel.

## Eligibility criteria

Eligible participants will be those: (1) aged between 6 months and 18 years, (2) receiving oral or intravenous antibiotics for common infections, (3) willing and able to start the probiotic intervention within 24 hours after the start of antibiotic intake, and (4) receiving broad-spectrum antibiotics (broad-spectrum penicillins, cephalosporins, fluoroquinolones, clindamycin).

The exclusion criteria will include the following: prior use of antibiotics within the previous 4 weeks, presence of a severe or generalised infection, history of severe chronic disease (e.g., cancer, inflammatory bowel disease, tuberculosis), critical/life-threatening illness, immunodeficiency, history of pre-existing diarrhoea within the previous 4 weeks, exclusive breastfeeding, allergy or hypersensitivity to any component of the study product, tube-feeding, use of proton-pump inhibitors, laxatives or anti-diarrhoeal drugs, or any probiotics 14 days before or during the study.

## Interventions

The experimental group will receive MP at a dose of  $10^{10}$  colony-forming units (CFU) daily. This food supplement consists of the 8 following bacterial strains:

- *Bifidobacterium bifidum* W23
- *Bifidobacterium lactis* W51
- *Lactobacillus acidophilus* W37
- *Lactobacillus acidophilus* W55
- *Lactobacillus paracasei* W20
- *Lactobacillus plantarum* W62



- *Lactobacillus rhamnosus* W71
- *Lactobacillus salivarius* W24

The product has a concentration of  $2.5 \times 10^9$  CFU/gram, and 2 grams will be given twice daily (total daily dosage of  $1 \times 10^{10}$  CFU). The dosage of MP to be used in this study is based on the aforementioned human studies with a comparable preparation. The control group will receive a placebo product that is indistinguishable in colour, smell, and taste from MP but without the live bacteria. Both MP and placebo will be a powder, which has to be dissolved in water or milk before use. The interval between antibiotic intake and probiotic consumption has to be at least 2 hours. The study products (MP and placebo) will be manufactured and supplied by Winclove Probiotics B.V., (Amsterdam, The Netherlands) free of charge.

### **Explanation for choice of comparators**

To enable assessment of the occurrence of AAD in this study's population, a placebo will be used as a comparator. Contrary to the "best available therapy" model, use of a placebo may lead to the development of a number of cases of theoretically avoidable AAD in the placebo group. However, overestimation of the MP's effectiveness will be avoided. One may argue that probiotics with proven efficacy such as LGG or *S. boulardii* should be used in the control group. However, it is noteworthy that they are only recommended if the use of probiotics for preventing AAD is considered because of the existence of risk factors such as class of antibiotic(s), duration of antibiotic treatment, age, need for hospitalization, comorbidities, or previous episodes of AAD diarrhoea.

### **Study procedure**

The recruiting physician will explain the study to caregivers of eligible patients and will supply them with a leaflet containing the study's description. Then, written informed consent will be obtained and archived. Participants will be randomised to receive orally twice daily either MP at a dose of  $5 \times 10^9$  CFU (total daily dosage of  $1 \times 10^{10}$  CFU) or a placebo during the antibiotic treatment and until 7 days after antibiotic cessation (i.e., the intervention period). Data from earlier studies suggest that doses of  $>5 \times 10^9$  CFU of probiotic microorganisms are more effective than doses  $<5 \times 10^9$  CFU in preventing AAD.<sup>18</sup>

1  
2  
3  
4 During the intervention period (i.e., the whole MP/placebo administration period),  
5 stool number and consistency will be recorded in a study diary, based on the  
6 Amsterdam Infant Stool Scale (AISS)<sup>19</sup> for children younger than 1 year and the  
7 Bristol Stool Form (BSF) scale<sup>20</sup> for children older than 1 year. The study diaries will  
8 be filled-in by caregivers of participants younger than 14 years or by participants  
9 themselves, providing they are older than 14 years. A score of A on the AISS or 5-7  
10 on the BSF scale will be considered as loose or watery stool. Caregivers also will be  
11 instructed to record any other observations concerning the health of the participants,  
12 including all adverse events involving the gastrointestinal tract (such as vomiting,  
13 decreased appetite, or abdominal pain) or other systems as well as information  
14 regarding compliance with treatment (i.e., if the participant has taken the MP or not)  
15 in the study diary. The diary will be returned to the study site at the end of the  
16 intervention period. Missing or incomplete data will be filled out using hospital charts,  
17 when possible.  
18  
19  
20  
21  
22  
23  
24  
25  
26  
27

28  
29 The participants will be reminded not to use other treatments that may affect the  
30 incidence or course of diarrhoea (e.g., other probiotics, diosmectite) during the  
31 intervention period. Withdrawal of consent for participation in the study will be  
32 possible at any moment, with no consequences, and without an obligation to give  
33 reasons for the decision. In case of the occurrence of serious adverse events or new  
34 circumstances affecting the safety of the participants (e.g., difficulty in swallowing, a  
35 new diagnosis of immunodeficiency), the intervention will be discontinued.  
36  
37  
38  
39  
40

41  
42 In cases of the occurrence of diarrhoea, stool samples will be obtained and examined  
43 for presence of common diarrhoeal pathogens – rotavirus, adenovirus, norovirus,  
44 *Campylobacter* spp., *Salmonella* spp., *Shigella* spp., and *Yersinia* spp. – via  
45 chromatographic immunoassay (for viruses) or isolation from stool culture (for  
46 bacteria). Additionally, *C. difficile* toxins A and B will be identified in stool using  
47 immunoassay in cases involving children older than 1 year.  
48  
49  
50  
51

52  
53 Additionally, participants' microbiota composition will be tested in stool at four time  
54 points: at baseline, at the day of antibiotic cessation, at the end of intervention, and  
55 one month after the intervention's cessation. The tests will be performed by analysing  
56  
57  
58  
59  
60

1  
2  
3 microbial gene sequences with 16S rRNA-based diversity methods. DNA will be  
4 extracted from the faecal samples by state-of the art methods in the laboratory of  
5 Wageningen University. By PCR amplified 16S rRNA gene fragments will be  
6 analysed with use of Illumina HiSeq Sequencer, and subsequent bio-informatic  
7 analyses will be performed by standardized pipelines within this laboratory. Next to  
8 this microbial biomass will be measured with quantitative PCR and/or flow cytometry.  
9 Microbial functionality (metabolites produced) can be performed in addition to the  
10 composition analyses, and will be done by proteome analyses.  
11  
12  
13  
14  
15

### 16 17 **Follow-up**

18 The primary and secondary outcomes (for details, see below) will be assessed during  
19 the intervention period. There will be no follow-up period. In cases of inpatients  
20 discharged before the end of the intervention period as well as in outpatients, the  
21 caregivers will be asked to bring the remaining product along with the study diary to  
22 the study site at the end of the 7-day intervention period.  
23  
24  
25  
26  
27

### 28 29 **Compliance**

30 Compliance with the study protocol will be assessed by direct interview with the  
31 patient and/or caregiver, by analysing information from the study diary, and by  
32 checking the number of returned non-consumed study products. Participants who  
33 receive <75% of the recommended dose of MP/placebo will be considered as non-  
34 compliant.  
35  
36  
37  
38  
39

### 40 41 **Outcome measures**

42 The **primary outcome** measure will be AAD defined as 3 or more loose or watery  
43 stools (a score of A on the AISS or 5-7 on the BSF scale) per day in a 24-hour period  
44 (in accordance with the World Health Organisation's diarrhoea definition<sup>21</sup>), caused  
45 by *C. difficile* infection or of otherwise unexplained aetiology (after testing for  
46 common diarrhoeal pathogens), occurring during the intervention period.  
47  
48  
49  
50

51 **Secondary outcomes** assessed during the intervention period will include AAD  
52 based on 2 other definitions of diarrhoea used in previous studies:

- 53 • ≥3 loose or watery stools per day for a minimum of a 48-hour period caused by *C.*  
54 *difficile* infection or of otherwise unexplained aetiology.  
55  
56  
57  
58  
59  
60

- $\geq 2$  loose or watery stools per day for a minimum of a 24-hour period caused by *C. difficile* infection or of otherwise unexplained aetiology.

For both definitions, loose or watery stools will correspond to a score of A on the AISS or 5-7 on the BSF scale. AAD needs to be caused by *C. difficile* infection or of unexplained aetiology (after testing for common diarrhoeal pathogens), and it must occur during the intervention period.

Other secondary outcome measures will be as follows:

- any diarrhoea (defined as  $\geq 3$  loose or watery stools per day for a minimum of 24 hours regardless of its aetiology),
- *C. difficile*-associated diarrhoea [diarrhoea defined as above caused by *C. difficile* confirmed by the presence of toxin-producing *C. difficile* in stools (positive toxin tests)],
- the duration of diarrhoea [defined as the time until the normalisation of stool consistency according to the BSF or AISS scale (on BSF scale, numbers 1, 2, 3 and 4; on AISS scale, letters B or C), and the presence of normal stools for 48 h],
- discontinuation of the antibiotic treatment due to severity of diarrhoea,
- hospitalisation caused by diarrhoea in outpatients,
- need for intravenous rehydration in any of the study groups,
- adverse events.
- intestinal microbiota composition, tested in stool samples as described above at four time points: at baseline, at the day of antibiotic cessation, at the end of intervention, and one month after the intervention's cessation.

The timeline of the study is presented in **Table 1**.

**Table 1.** The timeline of the study

|                                             | Intervention period          |   |   |   |   |              |                                       |                                 |        |        |        |        |        | Close-out<br>(n+37) |        |   |
|---------------------------------------------|------------------------------|---|---|---|---|--------------|---------------------------------------|---------------------------------|--------|--------|--------|--------|--------|---------------------|--------|---|
|                                             | Days of antibiotic treatment |   |   |   |   |              |                                       | Days after antibiotic treatment |        |        |        |        |        |                     |        |   |
|                                             | 1                            | 2 | 3 | 4 | 5 | every<br>day | n (end of<br>antibiotic<br>treatment) | n<br>+                          | n<br>+ | n<br>+ | n<br>+ | n<br>+ | n<br>+ |                     | n<br>+ |   |
| <b>Enrolment</b>                            |                              |   |   |   |   |              |                                       |                                 |        |        |        |        |        |                     |        |   |
| Eligibility assessment                      | x                            |   |   |   |   |              |                                       |                                 |        |        |        |        |        |                     |        |   |
| Informed consent reception                  | x                            |   |   |   |   |              |                                       |                                 |        |        |        |        |        |                     |        |   |
| Allocation and randomisation                | x                            |   |   |   |   |              |                                       |                                 |        |        |        |        |        |                     |        |   |
| Handing over of study diary                 | x                            |   |   |   |   |              |                                       |                                 |        |        |        |        |        |                     |        |   |
| <b>Interventions</b>                        |                              |   |   |   |   |              |                                       |                                 |        |        |        |        |        |                     |        |   |
| Multi-strain probiotic                      |                              | ← |   |   |   |              |                                       |                                 |        |        |        |        |        |                     |        | → |
| Placebo                                     |                              | ← |   |   |   |              |                                       |                                 |        |        |        |        |        |                     |        | → |
| <b>Data collection</b>                      |                              |   |   |   |   |              |                                       |                                 |        |        |        |        |        |                     |        |   |
| Study diary                                 |                              | ← |   |   |   |              |                                       |                                 |        |        |        |        |        |                     |        | → |
| Stool tests in case of diarrhoea            |                              | ← |   |   |   |              |                                       |                                 |        |        |        |        |        |                     |        | → |
| Stool microbiota examination                | x                            |   |   |   |   |              | x                                     |                                 |        |        |        |        |        |                     | x      | x |
| Reception of study diary and unused product |                              |   |   |   |   |              |                                       |                                 |        |        |        |        |        |                     |        | x |

### Sample size

The pooled incidence of AAD determined from previous studies conducted at the Medical University of Warsaw<sup>22-24</sup> is 13.5%, which is lower than 19% as reported in the Cochrane meta-analysis.<sup>3</sup> We have chosen to perform a sample size calculation based on an expected AAD incidence of 16%. Assuming a power of 80% and a significance level of 5%, a total sample of 350 participants will be needed to demonstrate a difference of 11 percentage points between the groups as statistically significant. The sample size calculation includes 20% of participants who are predicted to be lost to follow-up.

### Random sequence generation and allocation concealment

The randomisation will be performed centrally by Winclove Probiotics B.V. by a person not involved in the study. Blocked randomisation (blocks of 4) will be used to ensure a good balance of participant characteristics in each group. Allocation will be

1  
2  
3 determined by using a computerised random number generation process. All study  
4 products will be sequentially numbered. Coded study products will be handed over to  
5 the researchers. When the study has ended, participants will be divided into 2  
6 blinded groups, which will be used in the statistical analyses. After performing the  
7 analyses, code numbers will be opened by the coordinating and principal  
8 investigators. Sealed envelopes containing the allocation of each number will be  
9 handed to the principal investigator ensuring that if a medical problem occurs for  
10 which treatment allocation is needed, the code can at all times be broken.  
11  
12  
13  
14  
15

### 16 17 **Blinding**

18 The probiotic preparation and placebo will be stored in identical packages. The  
19 contents will look, smell, and taste the same. Researchers, caregivers, participants,  
20 medical personnel, and outcome assessors will all be blinded to the intervention until  
21 the study is completed and the data analysed.  
22  
23  
24  
25

### 26 27 **Data collection and management**

28 All study participants will receive a study identification number. Case Report Forms  
29 (CRFs) with baseline, outcome, and other trial data will be completed on paper. Data  
30 will then be entered and stored in a password-protected electronic database. The  
31 original paper copies of the CRFs and all study data will be stored in a locker within  
32 the study site, accessible to the involved researchers only. No patient information will  
33 be shared with the company performing the randomisation.  
34  
35  
36  
37  
38  
39

### 40 41 **Statistical analysis**

42 Descriptive statistics will be used to summarise baseline characteristics. Mean values  
43 of continuous variables will be compared with the Student's t-test or Mann-Whitney U  
44 test, depending on whether or not they are distributed normally. The  $\chi^2$  test or  
45 Fisher's exact test will be used, as appropriate, to compare dichotomous  
46 characteristics. For continuous outcomes, differences in means or differences in  
47 medians (for normal or non-normal distribution, respectively). For dichotomous  
48 outcomes, the relative risk (RR) and number needed to treat, calculated as the  
49 inverse of absolute risk reduction (ARR) all with a 95% CI, will be calculated. The  
50 difference between study groups will be considered significant when the p value is  
51  $<0.05$ , when the 95% CI for RR does not include 1.0, or when the 95% CI for mean  
52  
53  
54  
55  
56  
57  
58  
59  
60

1  
2  
3 difference (MD) does not include 0. All statistical tests will be two-tailed and  
4 performed at the 5% level of significance.  
5  
6

7 An intention-to-treat (ITT) model will be applied – data from all randomised  
8 participants will be used in the analysis, including those with low compliance or those  
9 who drop out or withdraw their consent. Per-protocol analysis will be performed as  
10 well, and it will include all participants who finish the study according to the protocol.  
11  
12  
13

### 14 15 **Monitoring**

16 The study will be carried out in accordance with the protocol, as it will be registered.  
17 No changes in the study protocol are expected to be made after the study starts.  
18 However, in case of any unexpected circumstances requiring alterations of the  
19 protocol, changes will be immediately applied to the protocol registry site at  
20 clinicaltrials.gov, and, if relevant enough, reported to the Bioethics committee. An  
21 independent Data and Safety Monitoring Board (DSMB) will be created before the  
22 start of the study. The DSMB will review data after recruitment from 25%, 50%, and  
23 75% of participants to assess the study progress (including rate of recruitment,  
24 completeness of data, and their appropriate collection) and all of the adverse events.  
25 The number of recruited patients will be monitored and kept up to date; appropriate  
26 changes (i.e., training of the recruiting physicians, study leaflets, addition of new  
27 recruitment centres) will be applied to the study procedure and protocol if the pace of  
28 recruitment is not high enough to finish the study within the established time, which is  
29 2 years.  
30  
31  
32  
33  
34  
35  
36  
37  
38  
39  
40

### 41 42 **Harms**

43 All 8 of the probiotic strains to be used in the study have the Qualified Presumption of  
44 Safety (QPS) status established by the European Food Safety Authority (EFSA).<sup>25</sup>  
45 The occurrence of serious adverse events in immunocompetent populations during  
46 oral use of probiotics is unlikely.<sup>26</sup>  
47  
48  
49  
50

51 The exact same product has not been assessed in previous studies. However,  
52 several clinical studies have been performed with a comparable product, in different  
53 populations (healthy volunteers and chronic obstructive pulmonary disease patients)  
54 in the Netherlands and Austria without any reported serious side effects.<sup>16 17 27</sup>  
55  
56  
57  
58  
59  
60



1  
2  
3 Moreover, currently a study is being performed with Ecologic AAD in patients with  
4 spinal cord injury who require antibiotic treatment during their inpatient rehabilitation  
5 (trial number: NTR5831).  
6  
7

8  
9 In addition, the preparation is commercially available in several countries (Austria,  
10 Germany, Greece, Norway, Russia, Slovenia, Ukraine, and the Netherlands) and  
11 since the market introduction in 2007, no serious adverse effects have been  
12 reported. In the Netherlands, probiotics are considered to be food or food  
13 supplements and, therefore, have to be produced under Hazard Analysis and Critical  
14 Control Point (HACCP) regulations, which is the Dutch regulation system for safety  
15 and hygiene in food and food supplements. All components are legally admitted as  
16 food additives or food components. Winlove is a NSF International Certified GMP  
17 Facility for manufacturing dietary supplements and works with the food safety  
18 management system ISO 22000:2005.  
19  
20  
21  
22  
23  
24

25  
26  
27 In case of suspected serious adverse events, the project leader will immediately  
28 notify the Ethics Committee, DSMB, all study personnel, and the manufacturer of the  
29 product about the nature of the event. The decision regarding continuation or  
30 discontinuation of the trial will be made by the project leader in agreement with the  
31 Ethics Committee and DSMB. All adverse events also will be noted in the CRFs.  
32  
33  
34  
35  
36

### 37 **ETHICS AND DISSEMINATION**

38 The protocol of the study was reviewed and approved by the Ethics Committee of the  
39 Medical University of Warsaw. Participants (or their legal representatives) will be fully  
40 informed about the study, and informed consent will be obtained. The manufacturer  
41 of the study products commented on the first draft of the protocol; however, all final  
42 decisions were made by the study team. The manufacturer will have no role in the  
43 conduct of the study, or in the analysis or interpretation of the data. The findings of  
44 this study, whether positive or negative, will be published in a peer-reviewed journal  
45 in accordance with Consolidated Standards of Reporting Trials (CONSORT).  
46 Abstracts will be submitted to relevant national and international conferences.  
47  
48  
49  
50  
51  
52  
53

### 54 **AUTHORS' CONTRIBUTIONS**

55 HS conceptualised the study. JŁ developed the first draft of the manuscript. Both  
56  
57  
58  
59  
60



1  
2  
3 authors contributed to and approved the final manuscript. HS is the guarantor.  
4  
5

## 6 **FUNDING STATEMENT**

7 This study will be funded by the Medical University of Warsaw. Both the placebo and  
8 the probiotic preparation will be manufactured and kindly provided for study purposes  
9 by Winclove Probiotics B.V., (Amsterdam, The Netherlands).  
10  
11  
12  
13

## 14 **COMPETING INTERESTS STATEMENT**

15 None declared.  
16  
17  
18

## 19 **REFERENCES**

- 20  
21  
22 1. Iqbal S, Quigley EM. Progress in Our Understanding of the Gut Microbiome:  
23 Implications for the Clinician. *Curr Gastroenterol Rep* 2016;18:49.  
24  
25 2. Szajewska H, Canani RB, Guarino A, et al. Probiotics for the Prevention of  
26 Antibiotic-Associated Diarrhea in Children. *J Pediatr Gastroenterol Nutr*  
27 2016;62:495-506.  
28  
29 3. Goldenberg JZ, Lytvyn L, Steurich J, et al. Probiotics for the prevention of  
30 pediatric antibiotic-associated diarrhea. *Cochrane Database Syst Rev*  
31 2015:Cd004827.  
32  
33 4. Georgieva M, Pancheva R, Rasheva N, et al. Use of the probiotic *Lactobacillus*  
34 *reuteri* DSM 17938 in the prevention of antibiotic associated infections in  
35 Bulgarian children: a randomized, controlled trial. . *Journal of IMAB - Annual*  
36 *Proceeding (Scientific Papers)* 2015;21:895-900.  
37  
38 5. Jirapinyo P, Densupsoontorn N, Thamonsiri N, et al. Prevention of antibiotic-  
39 associated diarrhea in infants by probiotics. *J Med Assoc Thai* 2002;85 Suppl  
40 2:S739-42.  
41  
42 6. Turck D, Bernet JP, Marx J, et al. Incidence and risk factors of oral antibiotic-  
43 associated diarrhea in an outpatient pediatric population. *J Pediatr Gastroenterol*  
44 *Nutr* 2003;37:22-6.  
45  
46 7. Bartlett JG. Clinical practice. Antibiotic-associated diarrhea. *N Engl J Med*  
47 2002;346:334-9.  
48  
49 8. McFarland LV. Antibiotic-associated diarrhea: epidemiology, trends and  
50 treatment. *Future Microbiol* 2008;3:563-78.  
51  
52  
53  
54  
55  
56  
57  
58  
59  
60

- 1  
2  
3 9. Hill C, Guarner F, Reid G, et al. Expert consensus document. The International  
4 Scientific Association for Probiotics and Prebiotics consensus statement on the  
5 scope and appropriate use of the term probiotic. *Nat Rev Gastroenterol Hepatol*  
6 2014;11:506-14.  
7
- 8  
9 10. Hell M, Bernhofer C, Stalzer P, et al. Probiotics in Clostridium difficile infection:  
10 reviewing the need for a multistrain probiotic. *Benef Microbes* 2013;4:39-51.
- 11 11. FAO/WHO. FAO/WHO Expert Consultation. Health and nutritional properties of  
12 probiotics in food including powder milk with live lactic acid bacteria. Cordoba,  
13 Argentina: FAO/WHO, 2001.
- 14 12. Szajewska H, Kolodziej M. Systematic review with meta-analysis: Lactobacillus  
15 rhamnosus GG in the prevention of antibiotic-associated diarrhoea in children  
16 and adults. *Aliment Pharmacol Ther* 2015;42:1149-57.
- 17 13. Szajewska H, Kolodziej M. Systematic review with meta-analysis:  
18 Saccharomyces boulardii in the prevention of antibiotic-associated diarrhoea.  
19 *Aliment Pharmacol Ther* 2015;42:793-801.
- 20 14. Chapman CM, Gibson GR, Rowland I. Health benefits of probiotics: are mixtures  
21 more effective than single strains? *Eur J Nutr* 2011;50:1-17.
- 22 15. Szajewska H, Guarino A, Hojsak I, et al. Use of probiotics for management of  
23 acute gastroenteritis: a position paper by the ESPGHAN Working Group for  
24 Probiotics and Prebiotics. *J Pediatr Gastroenterol Nutr* 2014;58:531-9.
- 25 16. Koning CJ, Jonkers DM, Stobberingh EE, et al. The effect of a multispecies  
26 probiotic on the intestinal microbiota and bowel movements in healthy volunteers  
27 taking the antibiotic amoxicillin. *Am J Gastroenterol* 2008;103:178-89.
- 28 17. Koning CJ, Jonkers D, Smidt H, et al. The effect of a multispecies probiotic on the  
29 composition of the faecal microbiota and bowel habits in chronic obstructive  
30 pulmonary disease patients treated with antibiotics. *Br J Nutr* 2010;103:1452-60.
- 31 18. Ouwehand AC. A review of dose-responses of probiotics in human studies. *Benef*  
32 *Microbes* 2017;8:143-51.
- 33 19. Ghanma A, Puttemans K, Deneyer M, et al. Amsterdam infant stool scale is more  
34 useful for assessing children who have not been toilet trained than Bristol stool  
35 scale. *Acta Paediatr* 2014;103:e91-2.
- 36 20. Lewis SJ, Heaton KW. Stool form scale as a useful guide to intestinal transit time.  
37 *Scand J Gastroenterol* 1997;32:920-4.

- 1
- 2
- 3 21. WHO. Essential Concepts Concerning Diarrhoea. The Treatment of diarrhoea: a
- 4 manual for physicians and other senior health workers. 4th ed. Geneva: WHO
- 5 Press 2005:4-5.
- 6
- 7 22. Kotowska M, Albrecht P, Szajewska H. Saccharomyces boulardii in the
- 8 prevention of antibiotic-associated diarrhoea in children: a randomized double-
- 9 blind placebo-controlled trial. *Aliment Pharmacol Ther* 2005;21:583-90.
- 10
- 11 23. Ruszczyński M, Radzikowski A, Szajewska H. Clinical trial: effectiveness of
- 12 Lactobacillus rhamnosus (strains E/N, Oxy and Pen) in the prevention of
- 13 antibiotic-associated diarrhoea in children. *Aliment Pharmacol Ther* 2008;28:154-
- 14 61.
- 15
- 16 24. Szajewska H, Albrecht P, Topczewska-Cabanek A. Randomized, double-blind,
- 17 placebo-controlled trial: effect of lactobacillus GG supplementation on
- 18 Helicobacter pylori eradication rates and side effects during treatment in children.
- 19 *J Pediatr Gastroenterol Nutr* 2009;48:431-6.
- 20
- 21 25. Hazards EPoB. Scientific Opinion on the maintenance of the list of QPS
- 22 biological agents intentionally added to food and feed (2013 update). *EFSA*
- 23 *Journal* 2013;11:3449-n/a.
- 24
- 25 26. van den Nieuwboer M, Claassen E, Morelli L, et al. Probiotic and synbiotic safety
- 26 in infants under two years of age. *Benef Microbes* 2014;5:45-60.
- 27
- 28 27. Koning CJM, Jonkers DMAE, Stobberingh E, et al. Effect of a multispecies
- 29 probiotic on the composition of the dominant faecal flora in healthy volunteers.
- 30 *Gut* 2005;54:A243.
- 31
- 32
- 33
- 34
- 35
- 36
- 37
- 38
- 39
- 40
- 41
- 42
- 43
- 44
- 45
- 46
- 47
- 48
- 49
- 50
- 51
- 52
- 53
- 54
- 55
- 56
- 57
- 58
- 59
- 60

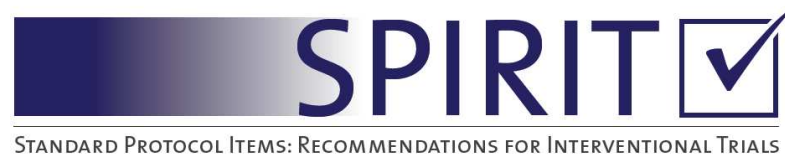

STANDARD PROTOCOL ITEMS: RECOMMENDATIONS FOR INTERVENTIONAL TRIALS

SPIRIT 2013 Checklist: Recommended items to address in a clinical trial protocol and related documents\*

| Section/item                      | Item No | Description                                                                                                                                                                                                                                                                              | Addressed on page number |
|-----------------------------------|---------|------------------------------------------------------------------------------------------------------------------------------------------------------------------------------------------------------------------------------------------------------------------------------------------|--------------------------|
| <b>Administrative information</b> |         |                                                                                                                                                                                                                                                                                          |                          |
| Title                             | 1       | Descriptive title identifying the study design, population, interventions, and, if applicable, trial acronym                                                                                                                                                                             | 1                        |
| Trial registration                | 2a      | Trial identifier and registry name. If not yet registered, name of intended registry                                                                                                                                                                                                     | 2                        |
|                                   | 2b      | All items from the World Health Organization Trial Registration Data Set                                                                                                                                                                                                                 | X                        |
| Protocol version                  | 3       | Date and version identifier                                                                                                                                                                                                                                                              | 1                        |
| Funding                           | 4       | Sources and types of financial, material, and other support                                                                                                                                                                                                                              | 15                       |
| Roles and responsibilities        | 5a      | Names, affiliations, and roles of protocol contributors                                                                                                                                                                                                                                  | 1, 14-15                 |
|                                   | 5b      | Name and contact information for the trial sponsor                                                                                                                                                                                                                                       | 1                        |
|                                   | 5c      | Role of study sponsor and funders, if any, in study design; collection, management, analysis, and interpretation of data; writing of the report; and the decision to submit the report for publication, including whether they will have ultimate authority over any of these activities | 15                       |
|                                   | 5d      | Composition, roles, and responsibilities of the coordinating centre, steering committee, endpoint adjudication committee, data management team, and other individuals or groups overseeing the trial, if applicable (see Item 21a for data monitoring committee)                         | x                        |

1  
2  
3  
4  
5  
6  
7  
8  
9  
10  
11  
12  
13  
14  
15  
16  
17  
18  
19  
20  
21  
22  
23  
24  
25  
26  
27  
28  
29  
30  
31  
32  
33  
34  
35  
36  
37  
38  
39  
40  
41  
42  
43  
44  
45  
46  
47

## Introduction

|                          |    |                                                                                                                                                                                                           |     |
|--------------------------|----|-----------------------------------------------------------------------------------------------------------------------------------------------------------------------------------------------------------|-----|
| Background and rationale | 6a | Description of research question and justification for undertaking the trial, including summary of relevant studies (published and unpublished) examining benefits and harms for each intervention        | 4-5 |
|                          | 6b | Explanation for choice of comparators                                                                                                                                                                     | 7   |
| Objectives               | 7  | Specific objectives or hypotheses                                                                                                                                                                         | 5   |
| Trial design             | 8  | Description of trial design including type of trial (eg, parallel group, crossover, factorial, single group), allocation ratio, and framework (eg, superiority, equivalence, noninferiority, exploratory) | 5   |

## Methods: Participants, interventions, and outcomes

|                      |     |                                                                                                                                                                                                                                                                                                                                                                                |      |
|----------------------|-----|--------------------------------------------------------------------------------------------------------------------------------------------------------------------------------------------------------------------------------------------------------------------------------------------------------------------------------------------------------------------------------|------|
| Study setting        | 9   | Description of study settings (eg, community clinic, academic hospital) and list of countries where data will be collected. Reference to where list of study sites can be obtained                                                                                                                                                                                             | 6    |
| Eligibility criteria | 10  | Inclusion and exclusion criteria for participants. If applicable, eligibility criteria for study centres and individuals who will perform the interventions (eg, surgeons, psychotherapists)                                                                                                                                                                                   | 6    |
| Interventions        | 11a | Interventions for each group with sufficient detail to allow replication, including how and when they will be administered                                                                                                                                                                                                                                                     | 6-7  |
|                      | 11b | Criteria for discontinuing or modifying allocated interventions for a given trial participant (eg, drug dose change in response to harms, participant request, or improving/worsening disease)                                                                                                                                                                                 | 8    |
|                      | 11c | Strategies to improve adherence to intervention protocols, and any procedures for monitoring adherence (eg, drug tablet return, laboratory tests)                                                                                                                                                                                                                              | 9    |
|                      | 11d | Relevant concomitant care and interventions that are permitted or prohibited during the trial                                                                                                                                                                                                                                                                                  | 8    |
| Outcomes             | 12  | Primary, secondary, and other outcomes, including the specific measurement variable (eg, systolic blood pressure), analysis metric (eg, change from baseline, final value, time to event), method of aggregation (eg, median, proportion), and time point for each outcome. Explanation of the clinical relevance of chosen efficacy and harm outcomes is strongly recommended | 9-10 |
| Participant timeline | 13  | Time schedule of enrolment, interventions (including any run-ins and washouts), assessments, and visits for participants. A schematic diagram is highly recommended (see Figure)                                                                                                                                                                                               | 11   |

|    |                                                                     |     |                                                                                                                                                                                                                                                                                                                                                                                                              |       |
|----|---------------------------------------------------------------------|-----|--------------------------------------------------------------------------------------------------------------------------------------------------------------------------------------------------------------------------------------------------------------------------------------------------------------------------------------------------------------------------------------------------------------|-------|
| 1  |                                                                     |     |                                                                                                                                                                                                                                                                                                                                                                                                              |       |
| 2  |                                                                     |     |                                                                                                                                                                                                                                                                                                                                                                                                              |       |
| 3  | Sample size                                                         | 14  | Estimated number of participants needed to achieve study objectives and how it was determined, including clinical and statistical assumptions supporting any sample size calculations                                                                                                                                                                                                                        | 11    |
| 4  |                                                                     |     |                                                                                                                                                                                                                                                                                                                                                                                                              |       |
| 5  | Recruitment                                                         | 15  | Strategies for achieving adequate participant enrolment to reach target sample size                                                                                                                                                                                                                                                                                                                          | 13    |
| 6  |                                                                     |     |                                                                                                                                                                                                                                                                                                                                                                                                              |       |
| 7  |                                                                     |     |                                                                                                                                                                                                                                                                                                                                                                                                              |       |
| 8  | <b>Methods: Assignment of interventions (for controlled trials)</b> |     |                                                                                                                                                                                                                                                                                                                                                                                                              |       |
| 9  |                                                                     |     |                                                                                                                                                                                                                                                                                                                                                                                                              |       |
| 10 | Allocation:                                                         |     |                                                                                                                                                                                                                                                                                                                                                                                                              |       |
| 11 |                                                                     |     |                                                                                                                                                                                                                                                                                                                                                                                                              |       |
| 12 | Sequence generation                                                 | 16a | Method of generating the allocation sequence (eg, computer-generated random numbers), and list of any factors for stratification. To reduce predictability of a random sequence, details of any planned restriction (eg, blocking) should be provided in a separate document that is unavailable to those who enrol participants or assign interventions                                                     | 11-12 |
| 13 |                                                                     |     |                                                                                                                                                                                                                                                                                                                                                                                                              |       |
| 14 |                                                                     |     |                                                                                                                                                                                                                                                                                                                                                                                                              |       |
| 15 |                                                                     |     |                                                                                                                                                                                                                                                                                                                                                                                                              |       |
| 16 |                                                                     |     |                                                                                                                                                                                                                                                                                                                                                                                                              |       |
| 17 | Allocation concealment mechanism                                    | 16b | Mechanism of implementing the allocation sequence (eg, central telephone; sequentially numbered, opaque, sealed envelopes), describing any steps to conceal the sequence until interventions are assigned                                                                                                                                                                                                    | 11-12 |
| 18 |                                                                     |     |                                                                                                                                                                                                                                                                                                                                                                                                              |       |
| 19 |                                                                     |     |                                                                                                                                                                                                                                                                                                                                                                                                              |       |
| 20 |                                                                     |     |                                                                                                                                                                                                                                                                                                                                                                                                              |       |
| 21 | Implementation                                                      | 16c | Who will generate the allocation sequence, who will enrol participants, and who will assign participants to interventions                                                                                                                                                                                                                                                                                    | 11-12 |
| 22 |                                                                     |     |                                                                                                                                                                                                                                                                                                                                                                                                              |       |
| 23 |                                                                     |     |                                                                                                                                                                                                                                                                                                                                                                                                              |       |
| 24 | Blinding (masking)                                                  | 17a | Who will be blinded after assignment to interventions (eg, trial participants, care providers, outcome assessors, data analysts), and how                                                                                                                                                                                                                                                                    | 12    |
| 25 |                                                                     |     |                                                                                                                                                                                                                                                                                                                                                                                                              |       |
| 26 |                                                                     |     |                                                                                                                                                                                                                                                                                                                                                                                                              |       |
| 27 |                                                                     | 17b | If blinded, circumstances under which unblinding is permissible, and procedure for revealing a participant's allocated intervention during the trial                                                                                                                                                                                                                                                         | 14    |
| 28 |                                                                     |     |                                                                                                                                                                                                                                                                                                                                                                                                              |       |
| 29 |                                                                     |     |                                                                                                                                                                                                                                                                                                                                                                                                              |       |
| 30 |                                                                     |     |                                                                                                                                                                                                                                                                                                                                                                                                              |       |
| 31 | <b>Methods: Data collection, management, and analysis</b>           |     |                                                                                                                                                                                                                                                                                                                                                                                                              |       |
| 32 |                                                                     |     |                                                                                                                                                                                                                                                                                                                                                                                                              |       |
| 33 | Data collection methods                                             | 18a | Plans for assessment and collection of outcome, baseline, and other trial data, including any related processes to promote data quality (eg, duplicate measurements, training of assessors) and a description of study instruments (eg, questionnaires, laboratory tests) along with their reliability and validity, if known. Reference to where data collection forms can be found, if not in the protocol | 8, 12 |
| 34 |                                                                     |     |                                                                                                                                                                                                                                                                                                                                                                                                              |       |
| 35 |                                                                     |     |                                                                                                                                                                                                                                                                                                                                                                                                              |       |
| 36 |                                                                     |     |                                                                                                                                                                                                                                                                                                                                                                                                              |       |
| 37 |                                                                     |     |                                                                                                                                                                                                                                                                                                                                                                                                              |       |
| 38 |                                                                     | 18b | Plans to promote participant retention and complete follow-up, including list of any outcome data to be collected for participants who discontinue or deviate from intervention protocols                                                                                                                                                                                                                    | x     |
| 39 |                                                                     |     |                                                                                                                                                                                                                                                                                                                                                                                                              |       |
| 40 |                                                                     |     |                                                                                                                                                                                                                                                                                                                                                                                                              |       |
| 41 |                                                                     |     |                                                                                                                                                                                                                                                                                                                                                                                                              |       |
| 42 |                                                                     |     |                                                                                                                                                                                                                                                                                                                                                                                                              |       |
| 43 |                                                                     |     |                                                                                                                                                                                                                                                                                                                                                                                                              |       |
| 44 |                                                                     |     |                                                                                                                                                                                                                                                                                                                                                                                                              |       |
| 45 |                                                                     |     |                                                                                                                                                                                                                                                                                                                                                                                                              |       |
| 46 |                                                                     |     |                                                                                                                                                                                                                                                                                                                                                                                                              |       |
| 47 |                                                                     |     |                                                                                                                                                                                                                                                                                                                                                                                                              |       |

1  
2  
3  
4  
5  
6  
7  
8  
9  
10  
11  
12  
13  
14  
15  
16  
17  
18  
19  
20  
21  
22  
23  
24  
25  
26  
27  
28  
29  
30  
31  
32  
33  
34  
35  
36  
37  
38  
39  
40  
41  
42  
43  
44  
45  
46  
47

|                     |     |                                                                                                                                                                                                                                                                   |       |
|---------------------|-----|-------------------------------------------------------------------------------------------------------------------------------------------------------------------------------------------------------------------------------------------------------------------|-------|
| Data management     | 19  | Plans for data entry, coding, security, and storage, including any related processes to promote data quality (eg, double data entry; range checks for data values). Reference to where details of data management procedures can be found, if not in the protocol | 12    |
| Statistical methods | 20a | Statistical methods for analysing primary and secondary outcomes. Reference to where other details of the statistical analysis plan can be found, if not in the protocol                                                                                          | 12-13 |
|                     | 20b | Methods for any additional analyses (eg, subgroup and adjusted analyses)                                                                                                                                                                                          | x     |
|                     | 20c | Definition of analysis population relating to protocol non-adherence (eg, as randomised analysis), and any statistical methods to handle missing data (eg, multiple imputation)                                                                                   | 13    |

**Methods: Monitoring**

|                 |     |                                                                                                                                                                                                                                                                                                                                       |          |
|-----------------|-----|---------------------------------------------------------------------------------------------------------------------------------------------------------------------------------------------------------------------------------------------------------------------------------------------------------------------------------------|----------|
| Data monitoring | 21a | Composition of data monitoring committee (DMC); summary of its role and reporting structure; statement of whether it is independent from the sponsor and competing interests; and reference to where further details about its charter can be found, if not in the protocol. Alternatively, an explanation of why a DMC is not needed | 13       |
|                 | 21b | Description of any interim analyses and stopping guidelines, including who will have access to these interim results and make the final decision to terminate the trial                                                                                                                                                               | 13-14    |
| Harms           | 22  | Plans for collecting, assessing, reporting, and managing solicited and spontaneously reported adverse events and other unintended effects of trial interventions or trial conduct                                                                                                                                                     | 8, 13-14 |
| Auditing        | 23  | Frequency and procedures for auditing trial conduct, if any, and whether the process will be independent from investigators and the sponsor                                                                                                                                                                                           | 13       |

**Ethics and dissemination**

|                          |    |                                                                                                                                                                                                                                  |    |
|--------------------------|----|----------------------------------------------------------------------------------------------------------------------------------------------------------------------------------------------------------------------------------|----|
| Research ethics approval | 24 | Plans for seeking research ethics committee/institutional review board (REC/IRB) approval                                                                                                                                        | 14 |
| Protocol amendments      | 25 | Plans for communicating important protocol modifications (eg, changes to eligibility criteria, outcomes, analyses) to relevant parties (eg, investigators, REC/IRBs, trial participants, trial registries, journals, regulators) | 13 |

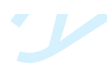

|    |                               |     |                                                                                                                                                                                                                                                                                     |       |
|----|-------------------------------|-----|-------------------------------------------------------------------------------------------------------------------------------------------------------------------------------------------------------------------------------------------------------------------------------------|-------|
| 1  |                               |     |                                                                                                                                                                                                                                                                                     |       |
| 2  |                               |     |                                                                                                                                                                                                                                                                                     |       |
| 3  | Consent or assent             | 26a | Who will obtain informed consent or assent from potential trial participants or authorised surrogates, and how (see Item 32)                                                                                                                                                        | 7     |
| 4  |                               |     |                                                                                                                                                                                                                                                                                     |       |
| 5  |                               |     |                                                                                                                                                                                                                                                                                     |       |
| 6  |                               | 26b | Additional consent provisions for collection and use of participant data and biological specimens in ancillary studies, if applicable                                                                                                                                               | x     |
| 7  |                               |     |                                                                                                                                                                                                                                                                                     |       |
| 8  | Confidentiality               | 27  | How personal information about potential and enrolled participants will be collected, shared, and maintained in order to protect confidentiality before, during, and after the trial                                                                                                | 12    |
| 9  |                               |     |                                                                                                                                                                                                                                                                                     |       |
| 10 |                               |     |                                                                                                                                                                                                                                                                                     |       |
| 11 | Declaration of interests      | 28  | Financial and other competing interests for principal investigators for the overall trial and each study site                                                                                                                                                                       | 15    |
| 12 |                               |     |                                                                                                                                                                                                                                                                                     |       |
| 13 |                               |     |                                                                                                                                                                                                                                                                                     |       |
| 14 | Access to data                | 29  | Statement of who will have access to the final trial dataset, and disclosure of contractual agreements that limit such access for investigators                                                                                                                                     | 14    |
| 15 |                               |     |                                                                                                                                                                                                                                                                                     |       |
| 16 |                               |     |                                                                                                                                                                                                                                                                                     |       |
| 17 | Ancillary and post-trial care | 30  | Provisions, if any, for ancillary and post-trial care, and for compensation to those who suffer harm from trial participation                                                                                                                                                       | x     |
| 18 |                               |     |                                                                                                                                                                                                                                                                                     |       |
| 19 |                               |     |                                                                                                                                                                                                                                                                                     |       |
| 20 | Dissemination policy          | 31a | Plans for investigators and sponsor to communicate trial results to participants, healthcare professionals, the public, and other relevant groups (eg, via publication, reporting in results databases, or other data sharing arrangements), including any publication restrictions | 14    |
| 21 |                               |     |                                                                                                                                                                                                                                                                                     |       |
| 22 |                               |     |                                                                                                                                                                                                                                                                                     |       |
| 23 |                               |     |                                                                                                                                                                                                                                                                                     |       |
| 24 |                               |     |                                                                                                                                                                                                                                                                                     |       |
| 25 |                               | 31b | Authorship eligibility guidelines and any intended use of professional writers                                                                                                                                                                                                      | 14-15 |
| 26 |                               |     |                                                                                                                                                                                                                                                                                     |       |
| 27 |                               | 31c | Plans, if any, for granting public access to the full protocol, participant-level dataset, and statistical code                                                                                                                                                                     | x     |
| 28 |                               |     |                                                                                                                                                                                                                                                                                     |       |
| 29 | <b>Appendices</b>             |     |                                                                                                                                                                                                                                                                                     |       |
| 30 |                               |     |                                                                                                                                                                                                                                                                                     |       |
| 31 | Informed consent materials    | 32  | Model consent form and other related documentation given to participants and authorised surrogates                                                                                                                                                                                  | x     |
| 32 |                               |     |                                                                                                                                                                                                                                                                                     |       |
| 33 |                               |     |                                                                                                                                                                                                                                                                                     |       |
| 34 | Biological specimens          | 33  | Plans for collection, laboratory evaluation, and storage of biological specimens for genetic or molecular analysis in the current trial and for future use in ancillary studies, if applicable                                                                                      | 8-9   |
| 35 |                               |     |                                                                                                                                                                                                                                                                                     |       |
| 36 |                               |     |                                                                                                                                                                                                                                                                                     |       |

37 \*It is strongly recommended that this checklist be read in conjunction with the SPIRIT 2013 Explanation & Elaboration for important clarification on the items.  
 38 Amendments to the protocol should be tracked and dated. The SPIRIT checklist is copyrighted by the SPIRIT Group under the Creative Commons  
 39 "[Attribution-NonCommercial-NoDerivs 3.0 Unported](https://creativecommons.org/licenses/by-nc-nd/3.0/)" license.  
 40



# BMJ Open

## The effect of a multispecies probiotic on reducing the incidence of antibiotic-associated diarrhoea in children: a protocol for a randomised controlled trial

|                                    |                                                                                                                                                               |
|------------------------------------|---------------------------------------------------------------------------------------------------------------------------------------------------------------|
| Journal:                           | <i>BMJ Open</i>                                                                                                                                               |
| Manuscript ID                      | bmjopen-2017-021214.R1                                                                                                                                        |
| Article Type:                      | Protocol                                                                                                                                                      |
| Date Submitted by the Author:      | 08-Mar-2018                                                                                                                                                   |
| Complete List of Authors:          | Łukasik, Jan; The Medical University of Warsaw, Department of Paediatrics<br>SZAJEWSKA, Hania; The Medical University of Warsaw, Department of<br>Paediatrics |
| <b>Primary Subject<br>Heading</b>: | Paediatrics                                                                                                                                                   |
| Secondary Subject Heading:         | Gastroenterology and hepatology                                                                                                                               |
| Keywords:                          | probiotics, antibiotics, diarrhoea, RCT                                                                                                                       |
|                                    |                                                                                                                                                               |

SCHOLARONE™  
Manuscripts

Peer Review Only

1  
2  
3 **The effect of a multispecies probiotic on reducing the incidence of antibiotic-**  
4 **associated diarrhoea in children: a protocol for a randomised controlled trial**  
5  
6

7 Jan Łukasik, Hania Szajewska  
8  
9

10 Department of Paediatrics, The Medical University of Warsaw, Poland  
11  
12  
13

14 **Corresponding author:**

15 Prof. Hania Szajewska, MD

16 Department of Paediatrics, The Medical University of Warsaw

17 Żwirki i Wigury 63A, 02-091 Warsaw, Poland,

18 email: hania@ipgate.pl  
19  
20  
21  
22  
23

24 **Date and protocol version identifier:** 14/10/2017  
25  
26

27 **Key words:** probiotics, antibiotics, diarrhoea, RCT  
28  
29

30 **Word count:** 3551

31 **Number of tables:** 1

32 **Number of references:** 28  
33  
34  
35  
36  
37  
38  
39  
40  
41  
42  
43  
44  
45  
46  
47  
48  
49  
50  
51  
52  
53  
54  
55  
56  
57  
58  
59  
60

## ABSTRACT

### Introduction

Certain individual probiotic strains have been proven to be effective in reducing the risk of antibiotic-associated diarrhoea (AAD). However, the effects of using multispecies probiotics remain unclear. We aim to assess the effectiveness of a specific multispecies probiotic preparation (Winclove 612) in reducing the incidence of AAD in children.

### Methods and analysis

A total of 350 children aged 6 months to 18 years, undergoing antibiotic treatment, will be randomly allocated to receive either a multispecies probiotic consisting of 2 strains of *Bifidobacterium* (*B. bifidum* W23, *B. lactis* W51) and 6 strains of *Lactobacillus* (*L. acidophilus* W37, *L. acidophilus* W55, *L. paracasei* W20, *L. plantarum* W62, *L. rhamnosus* W71, and *L. salivarius* W24) at a total dose of  $10^{10}$  colony-forming units daily, or a placebo, from the first day of antibiotic treatment until 7 days after antibiotic cessation, up to a maximum of 17 days. The primary outcome will be the incidence of AAD, defined as  $\geq 3$  loose or watery stools (a score of A on the Amsterdam Infant Stool Scale or a score of 5-7 on the Bristol Stool Form scale) in 24 hours, caused either by *Clostridium difficile* or of otherwise unexplained aetiology, occurring during the intervention period. The secondary outcomes will include the incidence of AAD according to alternative definitions; the incidence of any kind of diarrhoea; the duration of diarrhoea; the need for hospitalisation; intravenous rehydration or discontinuation of antibiotic treatment due to diarrhoea; adverse events; and the intestinal microbiota composition.

### Ethics and dissemination

The study protocol is approved by the Ethics Committee of the Medical University of Warsaw. The findings will be published in a peer-reviewed journal and submitted to relevant conferences.

### Trial registration

The trial is registered at [clinicaltrials.gov](http://clinicaltrials.gov), trial identifier: NCT03334604 Any important changes in the protocol will be implemented there.

## STRENGTHS AND LIMITATIONS OF THIS STUDY

- This study's design is simple, with the intent to answer a precise and unambiguous clinical question.
- The study protocol closely follows the rules included in the SPIRIT statement.
- This will be the first trial of this specific probiotic formulation in the paediatric population.
- The incidence of AAD in specific populations is difficult to predict and may turn out to be lower than expected, limiting the trial's statistical power.
- Since AAD may occur up to 8 weeks after antibiotic treatment, some cases may be missed in this study.

## INTRODUCTION

Antibiotics are well known to cause disturbances in the composition of the intestinal microbiota, leading to the development of gastrointestinal (GI) symptoms.<sup>1</sup> Antibiotic-associated diarrhoea (AAD), which may be defined as diarrhoea that occurs in relation to antibiotic treatment with the exclusion of other aetiologies, is a common complication of antibiotic use in children.<sup>2</sup> Based on the analysis of data from randomised controlled trials (RCTs) the pooled risk of AAD in children was 19%.<sup>3</sup> However, the risk varies greatly from study to study, ranging from 2.1%<sup>4</sup> to 80%<sup>5</sup>, depending on factors such as the adopted definition of diarrhoea, the study population, and the type of antibiotic treatment.<sup>6</sup> The underlying mechanism of AAD is not fully understood. It may be caused by a specific enteric pathogen (e.g., *Clostridium difficile*, *Clostridium perfringens*, *Staphylococcus aureus*, or *Candida albicans*), metabolic consequences of altered intestinal microbiota, or a direct effect of antibiotics on the mucosa.<sup>7</sup> AAD may vary both in severity (from uncomplicated diarrhoea to pseudomembranous colitis) and in incubation period (from the first day of antibiotic treatment to 8 weeks after discontinuation).<sup>8</sup>

The impact of antibiotics on commensal microorganisms of the gut justifies the idea of using probiotics to reduce the incidence of AAD. According to a consensus definition, probiotics are 'live microorganisms that, when administered in adequate amounts, confer a health benefit on the host'.<sup>9</sup> There are a number of potential mechanisms of their action, including activity in the intestinal lumen (e.g., competition with, or direct suppression of, pathogenic microorganisms), interaction with the mucosal barrier (e.g., up-regulation of tight junctions, modulation of water and ion channels), and influence on the intestinal immune system.<sup>10</sup>

Probiotic properties are species- and strain-specific, so each strain or their combinations should be examined separately.<sup>2 11</sup> In children, 2 probiotic strains with proven efficacy in the prevention of AAD are *Lactobacillus rhamnosus* GG and *Saccharomyces boulardii*.<sup>12 13</sup> Both are currently recommended to reduce the incidence of AAD in children, if the use of probiotics is considered.<sup>2</sup> Probiotic preparations consisting of more than one strain are not yet recommended for reducing the incidence of AAD in children, despite some evidence of their effectiveness.<sup>3 14</sup>

1  
2  
3  
4 In this trial, a preparation consisting of 8 probiotic strains (Winclove 612, Winclove  
5 Probiotics, the Netherlands), including 2 strains of Bifidobacterium (*Bifidobacterium*  
6 *bifidum* W23, *Bifidobacterium lactis* W51) and 6 strains of Lactobacillus  
7 (*Lactobacillus acidophilus* W37, *Lactobacillus acidophilus* W55, *Lactobacillus*  
8 *paracasei* W20, *Lactobacillus plantarum* W62, *Lactobacillus rhamnosus* W71, and  
9 *Lactobacillus salivarius* W24) will be used. Hereafter, this probiotic strain combination  
10 is referred to as 'multispecies probiotic' (MP). None of the individual strains included  
11 in MP have been proven to be effective in reducing the incidence of AAD. However,  
12 studies on the effectiveness of a comparable preparation, Ecologic AAD, in reducing  
13 diarrhoeal symptoms have been performed.<sup>15 16</sup> The aforementioned preparation has  
14 a similar composition to MP; however, it additionally contains *Enterococcus faecium*  
15 W54. The species *E. faecium* is not recommended for use in children by ESPGHAN  
16 due to unclear safety issues<sup>17</sup> and, therefore, is excluded from the current  
17 formulation. In one RCT conducted in 41 healthy adult volunteers receiving  
18 amoxicillin with either Ecologic AAD or placebo, subjects in the experimental group  
19 had a significantly lower rate of diarrhoea-like bowel movements compared with  
20 those in the placebo group (48% vs. 79%, respectively, RR=0.61, p<0.05).<sup>15</sup> Another  
21 RCT conducted in 45 adult patients with a chronic obstructive pulmonary disease  
22 exacerbation who were treated with antibiotics did not reveal a difference the in rate  
23 of diarrhoea-like bowel movements between the Ecologic AAD and placebo groups  
24 (77% vs. 70%, respectively, RR=1.1, p>0.05).<sup>16</sup> However, this study was carried out  
25 in a very specific group of patients, i.e., those with a history of frequent and  
26 prolonged antibiotic use. So far, there have been no RCTs using this probiotic  
27 preparation carried out in larger groups of participants or in children.  
28  
29  
30  
31  
32  
33  
34  
35  
36  
37  
38  
39  
40  
41  
42  
43  
44

## 45 **METHODS AND ANALYSIS**

### 46 **Aim**

47 The primary objective of this study is to test the hypothesis that the MP reduces the  
48 risk of AAD in children undergoing antibiotic treatment. Other objectives include  
49 investigating the MP's influence on the incidence of other types of diarrhoea,  
50 diarrhoea duration, intestinal microbiota composition, and potential adverse events  
51 associated with the MP's use.  
52  
53  
54  
55  
56  
57  
58  
59  
60

## Trial design

The study is a randomised, double-blind, placebo-controlled, parallel group trial with an allocation ratio of 1:1.

## Study setting

Participants in this study will be recruited among both the in- and outpatients of the Paediatric Hospital of the Medical University of Warsaw, Poland. In case of a low recruitment rate (defined as described in the 'Monitoring' section of this document), other hospitals and medical care centres would also be plausible sources of participants, providing the presence of adequately trained personnel. In case of the inclusion of additional recruitment centres, adequate information will be added to the protocol registry site, and the bioethics committee will be informed.

## Eligibility criteria

Eligibility criteria will be as follows: (1) age between 6 months and 18 years, (2) therapy with oral or intravenous antibiotics for common infections, (3) ability to start the probiotic intervention within 24 hours after the start of antibiotic intake, (4) therapy with broad-spectrum antibiotics (broad-spectrum penicillins, cephalosporins, fluoroquinolones, clindamycin), and (5) signed informed consent.

The exclusion criteria will include the following: prior use of antibiotics within the previous 4 weeks, presence of a severe or generalised infection, history of severe chronic disease (e.g., cancer, inflammatory bowel disease, tuberculosis), critical/life-threatening illness, immunodeficiency, history of pre-existing diarrhoea within the previous 4 weeks, exclusive breastfeeding, allergy or hypersensitivity to any component of the study product, tube-feeding, use of proton-pump inhibitors, laxatives, anti-diarrhoeal drugs, or any probiotics 14 days before or during the study,

## Interventions

The experimental group will receive MP at a dose of  $10^{10}$  colony-forming units (CFU) daily. This food supplement consists of the 8 following bacterial strains:

- *Bifidobacterium bifidum* W23
- *Bifidobacterium lactis* W51
- *Lactobacillus acidophilus* W37
- *Lactobacillus acidophilus* W55

- 1
- 2
- 3 - *Lactobacillus paracasei* W20
- 4 - *Lactobacillus plantarum* W62
- 5
- 6 - *Lactobacillus rhamnosus* W71
- 7
- 8 - *Lactobacillus salivarius* W24
- 9

10  
11 The product has a concentration of  $2.5 \times 10^9$  CFU/gram, and 2 grams will be given  
12 twice daily (total daily dosage of  $1 \times 10^{10}$  CFU). Apart from the probiotic strains, the  
13 active product consists of maize starch, maltodextrin, fructo-oligosaccharides P6,  
14 maize dextrin P9, potassium chloride, hydrolysed rice protein, magnesium sulphate,  
15 amylase, and manganese sulphate. The dosage of MP to be used in this study is  
16 based on the aforementioned human studies with a comparable preparation.<sup>15 16</sup> The  
17 control group will receive a placebo product that is indistinguishable in colour, smell,  
18 and taste from MP, and will have the same composition but without the live bacteria,  
19 fructo-oligosaccharides, and maize dextrin. Both MP and placebo will be a powder,  
20 which has to be dissolved in water or milk before use. The interval between antibiotic  
21 intake and probiotic consumption has to be at least 2 hours. The study products (MP  
22 and placebo) will be manufactured and supplied by Winclove Probiotics B.V.,  
23 (Amsterdam, The Netherlands) free of charge.  
24  
25  
26  
27  
28  
29  
30  
31  
32

33 The products will be transferred to the study site with a temperature control system,  
34 and the readings from a thermometer will be verified after their delivery. The study  
35 products will be stored at the study site in a locked, dark, and dry place, at room  
36 temperature.  
37  
38  
39  
40

#### 41 **Explanation for choice of comparators**

42 To enable assessment of the occurrence of AAD in this study's population, a placebo  
43 will be used as a comparator. Contrary to the "best available therapy" model, use of a  
44 placebo may lead to the development of a number of cases of theoretically avoidable  
45 AAD in the placebo group. However, overestimation of the MP's effectiveness will be  
46 avoided.<sup>18</sup> One may argue that probiotics with proven efficacy such as LGG or *S.*  
47 *boulardii* should be used in the control group. However, it is noteworthy that they are  
48 only recommended if the use of probiotics for preventing AAD is considered because  
49 of the existence of risk factors such as class of antibiotic(s), duration of antibiotic  
50 treatment, age, need for hospitalisation, comorbidities, or previous episodes of AAD  
51  
52  
53  
54  
55  
56  
57  
58  
59  
60



1  
2  
3 diarrhoea.<sup>2 19</sup> Due to these factors, no universal standard of care to reduce the risk of  
4 AAD in the paediatric population is defined.  
5  
6

### 7 8 **Study procedure**

9 The recruiting physician who is familiar with the study protocol will perform an  
10 eligibility screen on the prospective patients, who began therapy with antibiotics in  
11 the preceding 24 hours, based on their medical records. Then, during a face-to-face  
12 meeting with the patient's caregivers, the recruiter will obtain missing information  
13 concerning the inclusion and exclusion criteria, explain the study procedures, risks  
14 and benefits, and supply them with a leaflet containing the study's description. After  
15 that, written informed consent in two copies will be obtained from the participant's  
16 caregivers. Consent will be also obtained from participants themselves if they are 15  
17 years of age or older. Subsequently, the patient's case report form (CRF) will be  
18 created and archived along with one copy of the informed consent. Participants will  
19 be randomised to receive orally twice daily either MP at a dose of  $5 \times 10^9$  CFU (total  
20 daily dosage of  $1 \times 10^{10}$  CFU) or a placebo during the antibiotic treatment and until 7  
21 days after antibiotic cessation, up to a maximum of 17 days. This period is referred to  
22 as the intervention period later in the document. Data from earlier studies suggest  
23 that doses of  $>5 \times 10^9$  CFU of probiotic microorganisms are more effective than doses  
24  $<5 \times 10^9$  CFU in preventing AAD.<sup>20</sup>  
25  
26  
27  
28  
29  
30  
31  
32  
33  
34  
35

36 During the intervention period (i.e., the whole MP/placebo administration period),  
37 stool number and consistency will be recorded in a study diary, based on the  
38 Amsterdam Infant Stool Scale (AISS)<sup>21</sup> for children younger than 1 year and the  
39 Bristol Stool Form (BSF) scale<sup>22</sup> for children older than 1 year. The study diaries will  
40 be filled-in by caregivers of participants younger than 14 years or by participants  
41 themselves, providing they are older than 14 years. A score of A on the AISS or 5-7  
42 on the BSF scale will be considered as loose or watery stool. Caregivers also will be  
43 instructed to record any other observations concerning the health of the participants,  
44 including all adverse events involving the gastrointestinal tract (such as vomiting,  
45 decreased appetite, or abdominal pain) or other systems as well as information  
46 regarding compliance with treatment (i.e., if the participant has taken the MP or not)  
47 in the study diary. The diary will be returned to the study site at the end of the  
48  
49  
50  
51  
52  
53  
54  
55  
56  
57  
58  
59  
60

1  
2  
3 intervention period. The outcome data for inpatients (e.g., the occurrence of  
4 diarrhoea) will be verified using hospital charts.  
5  
6

7  
8 The participants will be reminded not to use other treatments during the intervention  
9 period that may affect the incidence or course of the diarrhoea, namely other  
10 probiotics, diosmectite, loperamide, proton pump inhibitors, or laxatives. Usage of  
11 any of the aforementioned preparations will be treated as a protocol violation, and  
12 such patients will not be included in the per protocol analysis. Caregivers will be  
13 asked to write down in the study diary any other medications or dietary supplements  
14 taken by the participants during the intervention period. Withdrawal of consent for  
15 participation in the study will be possible at any moment, with no consequences, and  
16 without an obligation to give reasons for the decision. In case of the occurrence of  
17 serious adverse events or new circumstances affecting the safety of the participants  
18 (e.g., difficulty in swallowing, a new diagnosis of immunodeficiency), the intervention  
19 will be discontinued.  
20  
21  
22  
23  
24  
25  
26  
27

28  
29 In cases of the occurrence of diarrhoea, stool samples will be obtained and examined  
30 for presence of common diarrhoeal pathogens – rotavirus, adenovirus, norovirus,  
31 *Campylobacter* spp., *Salmonella* spp., *Shigella* spp., and *Yersinia* spp. – via  
32 chromatographic immunoassay (for viruses) or isolation from stool culture (for  
33 bacteria). Additionally, *C. difficile* toxins A and B will be identified in stool using  
34 immunoassay in cases involving children older than 1 year.  
35  
36  
37  
38  
39

40 Additionally, participants' microbiota composition will be tested in stool at four time  
41 points: at baseline, at the day of antibiotic cessation, at the end of intervention, and  
42 one month after the intervention's cessation. The tests will be performed by analysing  
43 microbial gene sequences with 16S rRNA-based diversity methods. DNA will be  
44 extracted from the faecal samples by state-of the art methods in the laboratory of  
45 Wageningen University. PCR amplified 16S rRNA gene fragments will be  
46 analysed with use of Illumina HiSeq Sequencer, and subsequent bio-informatic  
47 analyses will be performed by standardised pipelines within this laboratory. Next to  
48 this microbial biomass will be measured with quantitative PCR and/or flow cytometry.  
49 Microbial functionality (metabolites produced) can be performed in addition to the  
50 composition analyses, and will be done by proteome analyses.  
51  
52  
53  
54  
55  
56  
57  
58  
59  
60

## Follow-up

The primary and secondary outcomes (for details, see below) will be assessed during the intervention period. There will be no follow-up period. In cases of inpatients discharged before the end of the intervention period as well as in outpatients, the caregivers will be asked to bring the remaining product along with the study diary to the study site at the end of the 7-day intervention period.

## Compliance

Compliance with the study protocol will be assessed by direct interview with the patient and/or caregiver, by analysing information from the study diary, and by checking the number of returned non-consumed study products. Participants who receive <75% of the recommended dose of MP/placebo will be considered as non-compliant.

## Outcome measures

The **primary outcome** measure will be AAD, defined as 3 or more loose or watery stools (a score of A on the AISS or 5-7 on the BSF scale) per day in a 24-hour period (in accordance with the World Health Organisation's diarrhoea definition<sup>23</sup>), caused by *C. difficile* infection or of otherwise unexplained aetiology (after testing for common diarrhoeal pathogens), occurring during the intervention period.

**Secondary outcomes** assessed during the intervention period will include AAD based on 2 other definitions of diarrhoea used in previous studies:

- $\geq 3$  loose or watery stools per day for a minimum of a 48-hour period caused by *C. difficile* infection or of otherwise unexplained aetiology.
- $\geq 2$  loose or watery stools per day for a minimum of a 24-hour period caused by *C. difficile* infection or of otherwise unexplained aetiology.

For both definitions, loose or watery stools will correspond to a score of A on the AISS or 5-7 on the BSF scale. AAD needs to be caused by *C. difficile* infection or of unexplained aetiology (after testing for common diarrhoeal pathogens), and it must occur during the intervention period.

Other secondary outcome measures will be as follows:

- any diarrhoea (defined as  $\geq 3$  loose or watery stools per day for a minimum of 24 hours regardless of its aetiology),
- *C. difficile*-associated diarrhoea [diarrhoea defined as above caused by *C. difficile* confirmed by the presence of toxin-producing *C. difficile* in stools (positive toxin tests)],
- the duration of diarrhoea [defined as the time until the normalisation of stool consistency according to the BSF or AISS scale (on BSF scale, numbers 1, 2, 3 and 4; on AISS scale, letters B or C), and the presence of normal stools for 48 h],
- discontinuation of the antibiotic treatment due to severity of diarrhoea,
- hospitalisation caused by diarrhoea in outpatients,
- need for intravenous rehydration in any of the study groups,
- adverse events.
- intestinal microbiota composition, tested in stool samples as described above at four time points: at baseline, at the day of antibiotic cessation, at the end of intervention, and one month after the intervention's cessation.

The timeline of the study is presented in **Table 1**.

**Table 1.** The timeline of the study

|                                             | Intervention period          |   |   |   |   |              |                                       |                                 |        |        |        |        |        | Close-out<br>(n+37) |        |
|---------------------------------------------|------------------------------|---|---|---|---|--------------|---------------------------------------|---------------------------------|--------|--------|--------|--------|--------|---------------------|--------|
|                                             | Days of antibiotic treatment |   |   |   |   |              |                                       | Days after antibiotic treatment |        |        |        |        |        |                     |        |
|                                             | 1                            | 2 | 3 | 4 | 5 | every<br>day | n (end of<br>antibiotic<br>treatment) | n<br>+                          | n<br>+ | n<br>+ | n<br>+ | n<br>+ | n<br>+ |                     | n<br>+ |
| <b>Enrolment</b>                            |                              |   |   |   |   |              |                                       |                                 |        |        |        |        |        |                     |        |
| Eligibility assessment                      | x                            |   |   |   |   |              |                                       |                                 |        |        |        |        |        |                     |        |
| Informed consent reception                  | x                            |   |   |   |   |              |                                       |                                 |        |        |        |        |        |                     |        |
| Allocation and randomisation                | x                            |   |   |   |   |              |                                       |                                 |        |        |        |        |        |                     |        |
| Handing over of study diary                 | x                            |   |   |   |   |              |                                       |                                 |        |        |        |        |        |                     |        |
| <b>Interventions</b>                        |                              |   |   |   |   |              |                                       |                                 |        |        |        |        |        |                     |        |
| Multi-strain probiotic                      |                              | ← |   |   |   |              |                                       |                                 |        |        |        |        |        |                     | →      |
| Placebo                                     |                              | ← |   |   |   |              |                                       |                                 |        |        |        |        |        |                     | →      |
| <b>Data collection</b>                      |                              |   |   |   |   |              |                                       |                                 |        |        |        |        |        |                     |        |
| Study diary                                 |                              | ← |   |   |   |              |                                       |                                 |        |        |        |        |        |                     | →      |
| Stool tests in case of diarrhoea            |                              | ← |   |   |   |              |                                       |                                 |        |        |        |        |        |                     | →      |
| Stool microbiota examination                | x                            |   |   |   |   |              | x                                     |                                 |        |        |        |        |        | x                   | x      |
| Reception of study diary and unused product |                              |   |   |   |   |              |                                       |                                 |        |        |        |        |        |                     | x      |

### Sample size

The pooled risk of AAD determined from previous studies conducted at the Medical University of Warsaw<sup>24 25</sup> is 12.4%. However, in those studies, the definition of diarrhoea was more strict – loose or watery stools had to last for at least 48 hours, so AAD is expected to be more frequent in our proposed study. Consequently, we have chosen to perform a sample size calculation based on an expected AAD risk of 16%, which is a compromise between the results from the Medical University of Warsaw and the pooled AAD risk of 19% as reported in the Cochrane meta-analysis.<sup>3</sup> To show a difference of 11% in the treatment effect in the study groups with  $\alpha=0.05$  and 80% power (unpaired Student t test), and assuming a 20% withdrawal rate, a total of 337 participants will be needed. Sample size calculations were performed with

1  
2  
3 StatsDirect (version 3.1.4, StatsDirect statistical software; StatsDirect Ltd, Cheshire,  
4 United Kingdom).  
5  
6

### 7 **Random sequence generation and allocation concealment**

8  
9 The randomisation will be performed centrally by Winclove Probiotics B.V. by a  
10 person not involved in the study. Blocked randomisation (blocks of 4) will be used to  
11 ensure a good balance of participant characteristics in each group. Allocation will be  
12 determined by using a computerised random number generation process. All study  
13 products will be sequentially numbered. Coded study products will be handed over to  
14 the researchers. When the study has ended, participants will be divided into 2  
15 blinded groups, which will be used in the statistical analyses. After performing the  
16 analyses, code numbers will be opened by the coordinating and principal  
17 investigators. Sealed envelopes containing the allocation of each number will be  
18 handed to the principal investigator ensuring that if a medical problem occurs for  
19 which treatment allocation is needed, the code can at all times be broken.  
20  
21  
22  
23  
24  
25  
26  
27

### 28 **Blinding**

29  
30 The probiotic preparation and placebo will be stored in identical packages. The  
31 contents will look, smell, and taste the same. Researchers, caregivers, participants,  
32 medical personnel, and outcome assessors will all be blinded to the intervention until  
33 the study is completed and the data analysed.  
34  
35  
36  
37

### 38 **Data collection and management**

39  
40 All study participants will receive a study identification number. Case Report Forms  
41 (CRFs) containing each participant's identification number and baseline data will be  
42 filled-in electronically and printed. Outcome data will be added to both the paper and  
43 electronic copies of the CRF after the reception of the study diary. Electronic data will  
44 be stored in a password-protected electronic database. The original paper copies of  
45 the CRFs and all study data will be stored in a locker within the study site. Both  
46 versions of the CRFs will be accessible to the involved researchers only. Overall,  
47 only the involved researchers will have access to the participant's personal  
48 information, and no personal data will be shared with the company performing the  
49 randomisation or with any other outside party.  
50  
51  
52  
53  
54  
55  
56  
57  
58  
59  
60

## Statistical analysis

Descriptive statistics will be used to summarise baseline characteristics. For continuous variables, comparison between groups will be done using the Student's t-test or Mann-Whitney U test, depending on whether or not the variables are distributed normally. The normality of the distribution will be checked using the Shapiro-Wilk test. The  $\chi^2$  test or Fisher's exact test will be used, as appropriate, to compare dichotomous variables. Differences between groups will be presented for continuous outcomes as differences in means or differences in medians (for normal or non-normal distribution, respectively) along with a 95% confidence interval (CI). For dichotomous outcomes, the relative risk (RR) and number needed to treat (NNT), calculated as the inverse of the absolute risk reduction (ARR), will be determined along with a 95% CI. In the second stage of analysis, the primary outcome will be analyzed by logistic regression, controlling for five pre-specified potential risk factors for AAD (age, sex, antibiotic class, duration of antibiotic treatment, and duration of hospital stay). The difference between study groups will be considered significant when the p value is  $<0.05$ , when the 95% CI for RR (or odds ratio, OR) does not include 1.0, or when the 95% CI for mean difference does not include 0. All statistical tests will be two-tailed and performed at the 5% level of significance.

An intention-to-treat (ITT) model will be applied – data from all randomised participants will be used in the analysis, including those with low compliance or those who drop out or withdraw their consent. Per-protocol analysis will be performed as well, and it will include all participants who finish the study according to the protocol.

## Monitoring

The study will be carried out in accordance with the protocol, as it will be registered. No changes in the study protocol are expected to be made after the study starts. However, in case of any unexpected circumstances requiring alterations of the protocol, changes will be immediately applied to the protocol registry site at [clinicaltrials.gov](http://clinicaltrials.gov), and, if relevant enough, reported to the Bioethics committee. An independent Data and Safety Monitoring Board (DSMB) will be created before the start of the study. The DSMB will review data after recruitment from 25%, 50%, and 75% of participants to assess the study progress (including rate of recruitment, completeness of data, and their appropriate collection) and all of the adverse events.



1  
2  
3 The number of recruited patients will be monitored and kept up to date; appropriate  
4 changes (i.e., training of the recruiting physicians, study leaflets, addition of new  
5 recruitment centres) will be applied to the study procedure and protocol if the pace of  
6 recruitment is not high enough to finish the study within the established time, which is  
7 2 years.  
8  
9

## 10 11 12 **Harms**

13  
14 All 8 of the probiotic strains to be used in the study have the Qualified Presumption of  
15 Safety (QPS) status established by the European Food Safety Authority (EFSA).<sup>26</sup>  
16 The occurrence of serious adverse events in immunocompetent populations during  
17 oral use of probiotics is unlikely.<sup>27</sup>  
18  
19  
20  
21

22 The exact same product has not been assessed in previous studies. However,  
23 several clinical studies have been performed with a comparable product, in different  
24 populations (healthy volunteers and chronic obstructive pulmonary disease patients)  
25 in the Netherlands and Austria without any reported serious side effects.<sup>15 16 28</sup>  
26 Moreover, currently a study is being performed with Ecologic AAD in patients with  
27 spinal cord injury who require antibiotic treatment during their inpatient rehabilitation  
28 (trial number: NTR5831).  
29  
30  
31  
32  
33  
34

35 In addition, the preparation is commercially available in several countries (Austria,  
36 Germany, Greece, Norway, Russia, Slovenia, Ukraine, and the Netherlands) and  
37 since the market introduction in 2007, no serious adverse effects have been  
38 reported. In the Netherlands, probiotics are considered to be food or food  
39 supplements and, therefore, have to be produced under Hazard Analysis and Critical  
40 Control Point (HACCP) regulations, which is the Dutch regulation system for safety  
41 and hygiene in food and food supplements. All components are legally admitted as  
42 food additives or food components. Winlove is a NSF International Certified GMP  
43 Facility for manufacturing dietary supplements and works with the food safety  
44 management system ISO 22000:2005.  
45  
46  
47  
48  
49  
50  
51

52  
53 Overall, based on the literature and manufacturer's data, we assume that receiving  
54 the study product poses only a marginal risk to the participants. Nevertheless, during  
55 the whole study period, the participants will benefit from telephone and e-mail contact  
56  
57  
58  
59  
60



1  
2  
3 with the primary investigator, so all the potential adverse events will be reported to  
4 and consulted by a physician. Moreover, patients at higher likelihood of experiencing  
5 severe adverse events (e.g., critical/life-threatening illness, immunodeficiency, or  
6 severe chronic illness) will not be recruited, as stated in the exclusion criteria.  
7  
8  
9

10  
11 Since adverse events of probiotic use are unlikely, no prespecified list will be a part  
12 of the study diary or CRF. Instead, a section entitled 'other symptoms' will be  
13 included, in which caregivers of the participants will be able to write down any other  
14 symptoms that occur during the intervention. Additionally, at the time of study diary  
15 reception, a physician will personally ask the caregiver about the occurrence of any  
16 symptoms during the study. As indicated in the CONSORT extension on harms  
17 document,<sup>29</sup> all of those symptoms will be reported for all of the randomised  
18 participants, including those who withdraw from the study. The data on adverse  
19 events will be presented for each study arm and each type of adverse event  
20 separately, with an exact count of each event, and distinction between patients with  
21 single and multiple events.  
22  
23  
24  
25  
26  
27  
28  
29

30  
31 In case of suspected serious adverse events, the project leader will immediately  
32 notify the Ethics Committee, DSMB, all study personnel, and the manufacturer of the  
33 product about the nature of the event. The decision regarding continuation or  
34 discontinuation of the trial will be made by the project leader in agreement with the  
35 Ethics Committee and DSMB. All adverse events also will be noted in the CRFs.  
36  
37  
38  
39

#### 40 **Patient and Public Involvement**

41 Patients and public were not involved in the design of the study.  
42  
43  
44

#### 45 **ETHICS AND DISSEMINATION**

46 The protocol of the study was reviewed and approved by the Ethics Committee of the  
47 Medical University of Warsaw. Participants (or their legal representatives) will be fully  
48 informed about the study, and informed consent will be obtained. The manufacturer  
49 of the study products commented on the first draft of the protocol; however, all final  
50 decisions were made by the study team who also will be in charge of all study data.  
51  
52

53 The manufacturer will have no role in the conduct of the study, or in the analysis or  
54 interpretation of the data. The findings of this study, whether positive or negative, will  
55  
56  
57  
58  
59  
60

1  
2  
3 be published in a peer-reviewed journal in accordance with Consolidated Standards  
4 of Reporting Trials (CONSORT). Abstracts will be submitted to relevant national and  
5 international conferences.  
6  
7

### 8 9 **AUTHORS' CONTRIBUTIONS**

10 HS conceptualised the study. JŁ developed the first draft of the manuscript. Both  
11 authors contributed to and approved the final manuscript. HS is the guarantor.  
12  
13  
14

### 15 16 **FUNDING STATEMENT**

17 This study will be funded by the Medical University of Warsaw. Both the placebo and  
18 the probiotic preparation will be manufactured and kindly provided for study purposes  
19 by Winclove Probiotics B.V., (Amsterdam, The Netherlands). Allocation concealment  
20 and randomisation procedures will also be performed by the product's manufacturer,  
21 as described above, free of charge. At the same time, the manufacturer will have no  
22 access to the patient's individual information and no role in the conduct of the study,  
23 management, analysis and interpretation of the data, or dissemination of the findings.  
24  
25  
26  
27  
28  
29

### 30 31 **COMPETING INTERESTS STATEMENT**

32 None declared.  
33  
34

### 35 36 **REFERENCES**

- 37 1. Iqbal S, Quigley EM. Progress in Our Understanding of the Gut Microbiome:  
38 Implications for the Clinician. *Curr Gastroenterol Rep* 2016;18:49.  
39
- 40 2. Szajewska H, Canani RB, Guarino A, et al. Probiotics for the Prevention of  
41 Antibiotic-Associated Diarrhea in Children. *J Pediatr Gastroenterol Nutr*  
42 2016;62:495-506.  
43
- 44 3. Goldenberg JZ, Lytvyn L, Steurich J, et al. Probiotics for the prevention of  
45 pediatric antibiotic-associated diarrhea. *Cochrane Database Syst Rev*  
46 2015:Cd004827.  
47
- 48 4. Georgieva M, Pancheva R, Rasheva N, et al. Use of the probiotic  
49 *Lactobacillus reuteri* DSM 17938 in the prevention of antibiotic associated  
50 infections in Bulgarian children: a randomized, controlled trial. . *Journal of*  
51 *IMAB - Annual Proceeding (Scientific Papers)* 2015;21:895-900.  
52  
53  
54  
55  
56  
57  
58  
59

- 1  
2  
3 5. Jirapinyo P, Densupsoontorn N, Thamonsiri N, et al. Prevention of antibiotic-associated diarrhea in infants by probiotics. *J Med Assoc Thai* 2002;85 Suppl 2:S739-42.
- 4  
5  
6  
7 6. Turck D, Bernet JP, Marx J, et al. Incidence and risk factors of oral antibiotic-associated diarrhea in an outpatient pediatric population. *J Pediatr Gastroenterol Nutr* 2003;37:22-6.
- 8  
9  
10  
11 7. Bartlett JG. Clinical practice. Antibiotic-associated diarrhea. *N Engl J Med* 2002;346:334-9.
- 12  
13  
14  
15 8. McFarland LV. Antibiotic-associated diarrhea: epidemiology, trends and treatment. *Future Microbiol* 2008;3:563-78.
- 16  
17  
18  
19 9. Hill C, Guarner F, Reid G, et al. Expert consensus document. The International Scientific Association for Probiotics and Prebiotics consensus statement on the scope and appropriate use of the term probiotic. *Nat Rev Gastroenterol Hepatol* 2014;11:506-14.
- 20  
21  
22  
23  
24 10. Hell M, Bernhofer C, Stalzer P, et al. Probiotics in Clostridium difficile infection: reviewing the need for a multistrain probiotic. *Benef Microbes* 2013;4:39-51.
- 25  
26  
27  
28 11. FAO/WHO. FAO/WHO Expert Consultation. Health and nutritional properties of probiotics in food including powder milk with live lactic acid bacteria. Cordoba, Argentina: FAO/WHO, 2001.
- 29  
30  
31  
32 12. Szajewska H, Kolodziej M. Systematic review with meta-analysis: Lactobacillus rhamnosus GG in the prevention of antibiotic-associated diarrhoea in children and adults. *Aliment Pharmacol Ther* 2015;42:1149-57.
- 33  
34  
35  
36 13. Szajewska H, Kolodziej M. Systematic review with meta-analysis: Saccharomyces boulardii in the prevention of antibiotic-associated diarrhoea. *Aliment Pharmacol Ther* 2015;42:793-801.
- 37  
38  
39  
40 14. Chapman CM, Gibson GR, Rowland I. Health benefits of probiotics: are mixtures more effective than single strains? *Eur J Nutr* 2011;50:1-17.
- 41  
42  
43  
44 15. Koning CJ, Jonkers DM, Stobberingh EE, et al. The effect of a multispecies probiotic on the intestinal microbiota and bowel movements in healthy volunteers taking the antibiotic amoxicillin. *Am J Gastroenterol* 2008;103:178-89.
- 45  
46  
47  
48  
49  
50  
51  
52 16. Koning CJ, Jonkers D, Smidt H, et al. The effect of a multispecies probiotic on the composition of the faecal microbiota and bowel habits in chronic

- 1  
2  
3 obstructive pulmonary disease patients treated with antibiotics. *Br J Nutr*  
4 2010;103:1452-60.  
5  
6 17. Szajewska H, Guarino A, Hojsak I, et al. Use of probiotics for management of  
7 acute gastroenteritis: a position paper by the ESPGHAN Working Group for  
8 Probiotics and Prebiotics. *J Pediatr Gastroenterol Nutr* 2014;58:531-9.  
9  
10 18. Castro M. Placebo versus best-available-therapy control group in clinical trials  
11 for pharmacologic therapies: which is better? *Proc Am Thorac Soc*  
12 2007;4:570-3.  
13  
14 19. Hojsak I. Probiotics in Children: What Is the Evidence? *Pediatr Gastroenterol*  
15 *Hepatol Nutr* 2017;20:139-46.  
16  
17 20. Ouwehand AC. A review of dose-responses of probiotics in human studies.  
18 *Benef Microbes* 2017;8:143-51.  
19  
20 21. Ghanma A, Puttemans K, Deneyer M, et al. Amsterdam infant stool scale is  
21 more useful for assessing children who have not been toilet trained than  
22 Bristol stool scale. *Acta Paediatr* 2014;103:e91-2.  
23  
24 22. Lewis SJ, Heaton KW. Stool form scale as a useful guide to intestinal transit  
25 time. *Scand J Gastroenterol* 1997;32:920-4.  
26  
27 23. WHO. Essential Concepts Concerning Diarrhoea. The Treatment of diarrhoea:  
28 a manual for physicians and other senior health workers. 4th ed. Geneva:  
29 WHO Press 2005:4-5.  
30  
31 24. Ruszczynski M, Radzikowski A, Szajewska H. Clinical trial: effectiveness of  
32 Lactobacillus rhamnosus (strains E/N, Oxy and Pen) in the prevention of  
33 antibiotic-associated diarrhoea in children. *Aliment Pharmacol Ther*  
34 2008;28:154-61.  
35  
36 25. Kotowska M, Albrecht P, Szajewska H. Saccharomyces boulardii in the  
37 prevention of antibiotic-associated diarrhoea in children: a randomized double-  
38 blind placebo-controlled trial. *Aliment Pharmacol Ther* 2005;21:583-90.  
39  
40 26. Hazards EPoB. Scientific Opinion on the maintenance of the list of QPS  
41 biological agents intentionally added to food and feed (2013 update). *EFSA*  
42 *Journal* 2013;11:3449-n/a.  
43  
44 27. van den Nieuwboer M, Claassen E, Morelli L, et al. Probiotic and synbiotic  
45 safety in infants under two years of age. *Benef Microbes* 2014;5:45-60.  
46  
47  
48  
49  
50  
51  
52  
53  
54  
55  
56  
57  
58  
59  
60

- 1  
2  
3 28. Koning CJM, Jonkers DMAE, Stobberingh E, et al. Effect of a multispecies  
4 probiotic on the composition of the dominant faecal flora in healthy volunteers.  
5 *Gut* 2005;54:A243.  
6  
7 29. Ioannidis JP, Evans SJ, Gotzsche PC, et al. Better reporting of harms in  
8 randomized trials: an extension of the CONSORT statement. *Ann Intern Med*  
9 2004;141:781-8.  
10  
11  
12  
13  
14  
15  
16  
17  
18  
19  
20  
21  
22  
23  
24  
25  
26  
27  
28  
29  
30  
31  
32  
33  
34  
35  
36  
37  
38  
39  
40  
41  
42  
43  
44  
45  
46  
47  
48  
49  
50  
51  
52  
53  
54  
55  
56  
57  
58  
59  
60

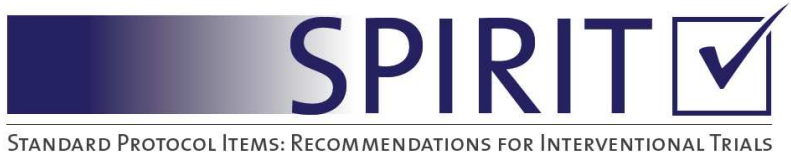

1  
2  
3  
4  
5  
6  
7  
8  
9  
10  
11  
12  
13  
14  
15  
16  
17  
18  
19  
20  
21  
22  
23  
24  
25  
26  
27  
28  
29  
30  
31  
32  
33  
34  
35  
36  
37  
38  
39  
40  
41  
42  
43  
44  
45  
46  
47

SPIRIT 2013 Checklist: Recommended items to address in a clinical trial protocol and related documents\*

| Section/item                      | Item No | Description                                                                                                                                                                                                                                                                              | Addressed on page number |
|-----------------------------------|---------|------------------------------------------------------------------------------------------------------------------------------------------------------------------------------------------------------------------------------------------------------------------------------------------|--------------------------|
| <b>Administrative information</b> |         |                                                                                                                                                                                                                                                                                          |                          |
| Title                             | 1       | Descriptive title identifying the study design, population, interventions, and, if applicable, trial acronym                                                                                                                                                                             | 1                        |
| Trial registration                | 2a      | Trial identifier and registry name. If not yet registered, name of intended registry                                                                                                                                                                                                     | 2                        |
|                                   | 2b      | All items from the World Health Organization Trial Registration Data Set                                                                                                                                                                                                                 | X                        |
| Protocol version                  | 3       | Date and version identifier                                                                                                                                                                                                                                                              | 1                        |
| Funding                           | 4       | Sources and types of financial, material, and other support                                                                                                                                                                                                                              | 15                       |
| Roles and responsibilities        | 5a      | Names, affiliations, and roles of protocol contributors                                                                                                                                                                                                                                  | 1, 14-15                 |
|                                   | 5b      | Name and contact information for the trial sponsor                                                                                                                                                                                                                                       | 1                        |
|                                   | 5c      | Role of study sponsor and funders, if any, in study design; collection, management, analysis, and interpretation of data; writing of the report; and the decision to submit the report for publication, including whether they will have ultimate authority over any of these activities | 15                       |
|                                   | 5d      | Composition, roles, and responsibilities of the coordinating centre, steering committee, endpoint adjudication committee, data management team, and other individuals or groups overseeing the trial, if applicable (see Item 21a for data monitoring committee)                         | x                        |

## Introduction

|                          |    |                                                                                                                                                                                                           |     |
|--------------------------|----|-----------------------------------------------------------------------------------------------------------------------------------------------------------------------------------------------------------|-----|
| Background and rationale | 6a | Description of research question and justification for undertaking the trial, including summary of relevant studies (published and unpublished) examining benefits and harms for each intervention        | 4-5 |
|                          | 6b | Explanation for choice of comparators                                                                                                                                                                     | 7   |
| Objectives               | 7  | Specific objectives or hypotheses                                                                                                                                                                         | 5   |
| Trial design             | 8  | Description of trial design including type of trial (eg, parallel group, crossover, factorial, single group), allocation ratio, and framework (eg, superiority, equivalence, noninferiority, exploratory) | 5   |

## Methods: Participants, interventions, and outcomes

|                      |     |                                                                                                                                                                                                                                                                                                                                                                                |      |
|----------------------|-----|--------------------------------------------------------------------------------------------------------------------------------------------------------------------------------------------------------------------------------------------------------------------------------------------------------------------------------------------------------------------------------|------|
| Study setting        | 9   | Description of study settings (eg, community clinic, academic hospital) and list of countries where data will be collected. Reference to where list of study sites can be obtained                                                                                                                                                                                             | 6    |
| Eligibility criteria | 10  | Inclusion and exclusion criteria for participants. If applicable, eligibility criteria for study centres and individuals who will perform the interventions (eg, surgeons, psychotherapists)                                                                                                                                                                                   | 6    |
| Interventions        | 11a | Interventions for each group with sufficient detail to allow replication, including how and when they will be administered                                                                                                                                                                                                                                                     | 6-7  |
|                      | 11b | Criteria for discontinuing or modifying allocated interventions for a given trial participant (eg, drug dose change in response to harms, participant request, or improving/worsening disease)                                                                                                                                                                                 | 8    |
|                      | 11c | Strategies to improve adherence to intervention protocols, and any procedures for monitoring adherence (eg, drug tablet return, laboratory tests)                                                                                                                                                                                                                              | 9    |
|                      | 11d | Relevant concomitant care and interventions that are permitted or prohibited during the trial                                                                                                                                                                                                                                                                                  | 8    |
| Outcomes             | 12  | Primary, secondary, and other outcomes, including the specific measurement variable (eg, systolic blood pressure), analysis metric (eg, change from baseline, final value, time to event), method of aggregation (eg, median, proportion), and time point for each outcome. Explanation of the clinical relevance of chosen efficacy and harm outcomes is strongly recommended | 9-10 |
| Participant timeline | 13  | Time schedule of enrolment, interventions (including any run-ins and washouts), assessments, and visits for participants. A schematic diagram is highly recommended (see Figure)                                                                                                                                                                                               | 11   |

1  
2  
3  
4  
5  
6  
7  
8  
9  
10  
11  
12  
13  
14  
15  
16  
17  
18  
19  
20  
21  
22  
23  
24  
25  
26  
27  
28  
29  
30  
31  
32  
33  
34  
35  
36  
37  
38  
39  
40  
41  
42  
43  
44  
45  
46  
47

Sample size 14 Estimated number of participants needed to achieve study objectives and how it was determined, including clinical and statistical assumptions supporting any sample size calculations 11

Recruitment 15 Strategies for achieving adequate participant enrolment to reach target sample size 13

**Methods: Assignment of interventions (for controlled trials)**

Allocation:

Sequence generation 16a Method of generating the allocation sequence (eg, computer-generated random numbers), and list of any factors for stratification. To reduce predictability of a random sequence, details of any planned restriction (eg, blocking) should be provided in a separate document that is unavailable to those who enrol participants or assign interventions 11-12

Allocation concealment mechanism 16b Mechanism of implementing the allocation sequence (eg, central telephone; sequentially numbered, opaque, sealed envelopes), describing any steps to conceal the sequence until interventions are assigned 11-12

Implementation 16c Who will generate the allocation sequence, who will enrol participants, and who will assign participants to interventions 11-12

Blinding (masking) 17a Who will be blinded after assignment to interventions (eg, trial participants, care providers, outcome assessors, data analysts), and how 12

17b If blinded, circumstances under which unblinding is permissible, and procedure for revealing a participant's allocated intervention during the trial 14

**Methods: Data collection, management, and analysis**

Data collection methods 18a Plans for assessment and collection of outcome, baseline, and other trial data, including any related processes to promote data quality (eg, duplicate measurements, training of assessors) and a description of study instruments (eg, questionnaires, laboratory tests) along with their reliability and validity, if known. Reference to where data collection forms can be found, if not in the protocol 8, 12

18b Plans to promote participant retention and complete follow-up, including list of any outcome data to be collected for participants who discontinue or deviate from intervention protocols x



|    |                                 |     |                                                                                                                                                                                                                                                                                                                                       |          |
|----|---------------------------------|-----|---------------------------------------------------------------------------------------------------------------------------------------------------------------------------------------------------------------------------------------------------------------------------------------------------------------------------------------|----------|
| 1  |                                 |     |                                                                                                                                                                                                                                                                                                                                       |          |
| 2  |                                 |     |                                                                                                                                                                                                                                                                                                                                       |          |
| 3  | Data management                 | 19  | Plans for data entry, coding, security, and storage, including any related processes to promote data quality (eg, double data entry; range checks for data values). Reference to where details of data management procedures can be found, if not in the protocol                                                                     | 12       |
| 4  |                                 |     |                                                                                                                                                                                                                                                                                                                                       |          |
| 5  |                                 |     |                                                                                                                                                                                                                                                                                                                                       |          |
| 6  |                                 |     |                                                                                                                                                                                                                                                                                                                                       |          |
| 7  | Statistical methods             | 20a | Statistical methods for analysing primary and secondary outcomes. Reference to where other details of the statistical analysis plan can be found, if not in the protocol                                                                                                                                                              | 12-13    |
| 8  |                                 |     |                                                                                                                                                                                                                                                                                                                                       |          |
| 9  |                                 |     |                                                                                                                                                                                                                                                                                                                                       |          |
| 10 |                                 | 20b | Methods for any additional analyses (eg, subgroup and adjusted analyses)                                                                                                                                                                                                                                                              | x        |
| 11 |                                 |     |                                                                                                                                                                                                                                                                                                                                       |          |
| 12 |                                 | 20c | Definition of analysis population relating to protocol non-adherence (eg, as randomised analysis), and any statistical methods to handle missing data (eg, multiple imputation)                                                                                                                                                       | 13       |
| 13 |                                 |     |                                                                                                                                                                                                                                                                                                                                       |          |
| 14 |                                 |     |                                                                                                                                                                                                                                                                                                                                       |          |
| 15 | <b>Methods: Monitoring</b>      |     |                                                                                                                                                                                                                                                                                                                                       |          |
| 16 |                                 |     |                                                                                                                                                                                                                                                                                                                                       |          |
| 17 | Data monitoring                 | 21a | Composition of data monitoring committee (DMC); summary of its role and reporting structure; statement of whether it is independent from the sponsor and competing interests; and reference to where further details about its charter can be found, if not in the protocol. Alternatively, an explanation of why a DMC is not needed | 13       |
| 18 |                                 |     |                                                                                                                                                                                                                                                                                                                                       |          |
| 19 |                                 |     |                                                                                                                                                                                                                                                                                                                                       |          |
| 20 |                                 |     |                                                                                                                                                                                                                                                                                                                                       |          |
| 21 |                                 |     |                                                                                                                                                                                                                                                                                                                                       |          |
| 22 |                                 | 21b | Description of any interim analyses and stopping guidelines, including who will have access to these interim results and make the final decision to terminate the trial                                                                                                                                                               | 13-14    |
| 23 |                                 |     |                                                                                                                                                                                                                                                                                                                                       |          |
| 24 |                                 |     |                                                                                                                                                                                                                                                                                                                                       |          |
| 25 | Harms                           | 22  | Plans for collecting, assessing, reporting, and managing solicited and spontaneously reported adverse events and other unintended effects of trial interventions or trial conduct                                                                                                                                                     | 8, 13-14 |
| 26 |                                 |     |                                                                                                                                                                                                                                                                                                                                       |          |
| 27 |                                 |     |                                                                                                                                                                                                                                                                                                                                       |          |
| 28 | Auditing                        | 23  | Frequency and procedures for auditing trial conduct, if any, and whether the process will be independent from investigators and the sponsor                                                                                                                                                                                           | 13       |
| 29 |                                 |     |                                                                                                                                                                                                                                                                                                                                       |          |
| 30 |                                 |     |                                                                                                                                                                                                                                                                                                                                       |          |
| 31 |                                 |     |                                                                                                                                                                                                                                                                                                                                       |          |
| 32 | <b>Ethics and dissemination</b> |     |                                                                                                                                                                                                                                                                                                                                       |          |
| 33 |                                 |     |                                                                                                                                                                                                                                                                                                                                       |          |
| 34 | Research ethics approval        | 24  | Plans for seeking research ethics committee/institutional review board (REC/IRB) approval                                                                                                                                                                                                                                             | 14       |
| 35 |                                 |     |                                                                                                                                                                                                                                                                                                                                       |          |
| 36 |                                 |     |                                                                                                                                                                                                                                                                                                                                       |          |
| 37 | Protocol amendments             | 25  | Plans for communicating important protocol modifications (eg, changes to eligibility criteria, outcomes, analyses) to relevant parties (eg, investigators, REC/IRBs, trial participants, trial registries, journals, regulators)                                                                                                      | 13       |
| 38 |                                 |     |                                                                                                                                                                                                                                                                                                                                       |          |
| 39 |                                 |     |                                                                                                                                                                                                                                                                                                                                       |          |
| 40 |                                 |     |                                                                                                                                                                                                                                                                                                                                       |          |
| 41 |                                 |     |                                                                                                                                                                                                                                                                                                                                       |          |
| 42 |                                 |     |                                                                                                                                                                                                                                                                                                                                       |          |
| 43 |                                 |     |                                                                                                                                                                                                                                                                                                                                       |          |
| 44 |                                 |     |                                                                                                                                                                                                                                                                                                                                       |          |
| 45 |                                 |     |                                                                                                                                                                                                                                                                                                                                       |          |
| 46 |                                 |     |                                                                                                                                                                                                                                                                                                                                       |          |
| 47 |                                 |     |                                                                                                                                                                                                                                                                                                                                       |          |

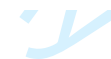

1  
2  
3  
4  
5  
6  
7  
8  
9  
10  
11  
12  
13  
14  
15  
16  
17  
18  
19  
20  
21  
22  
23  
24  
25  
26  
27  
28  
29  
30  
31  
32  
33  
34  
35  
36  
37  
38  
39  
40  
41  
42  
43  
44  
45  
46  
47

|                               |     |                                                                                                                                                                                                                                                                                     |       |
|-------------------------------|-----|-------------------------------------------------------------------------------------------------------------------------------------------------------------------------------------------------------------------------------------------------------------------------------------|-------|
| Consent or assent             | 26a | Who will obtain informed consent or assent from potential trial participants or authorised surrogates, and how (see Item 32)                                                                                                                                                        | 7     |
|                               | 26b | Additional consent provisions for collection and use of participant data and biological specimens in ancillary studies, if applicable                                                                                                                                               | x     |
| Confidentiality               | 27  | How personal information about potential and enrolled participants will be collected, shared, and maintained in order to protect confidentiality before, during, and after the trial                                                                                                | 12    |
| Declaration of interests      | 28  | Financial and other competing interests for principal investigators for the overall trial and each study site                                                                                                                                                                       | 15    |
| Access to data                | 29  | Statement of who will have access to the final trial dataset, and disclosure of contractual agreements that limit such access for investigators                                                                                                                                     | 14    |
| Ancillary and post-trial care | 30  | Provisions, if any, for ancillary and post-trial care, and for compensation to those who suffer harm from trial participation                                                                                                                                                       | x     |
| Dissemination policy          | 31a | Plans for investigators and sponsor to communicate trial results to participants, healthcare professionals, the public, and other relevant groups (eg, via publication, reporting in results databases, or other data sharing arrangements), including any publication restrictions | 14    |
|                               | 31b | Authorship eligibility guidelines and any intended use of professional writers                                                                                                                                                                                                      | 14-15 |
|                               | 31c | Plans, if any, for granting public access to the full protocol, participant-level dataset, and statistical code                                                                                                                                                                     | x     |
| <b>Appendices</b>             |     |                                                                                                                                                                                                                                                                                     |       |
| Informed consent materials    | 32  | Model consent form and other related documentation given to participants and authorised surrogates                                                                                                                                                                                  | x     |
| Biological specimens          | 33  | Plans for collection, laboratory evaluation, and storage of biological specimens for genetic or molecular analysis in the current trial and for future use in ancillary studies, if applicable                                                                                      | 8-9   |

---

\*It is strongly recommended that this checklist be read in conjunction with the SPIRIT 2013 Explanation & Elaboration for important clarification on the items. Amendments to the protocol should be tracked and dated. The SPIRIT checklist is copyrighted by the SPIRIT Group under the Creative Commons "[Attribution-NonCommercial-NoDerivs 3.0 Unported](https://creativecommons.org/licenses/by-nc-nd/3.0/)" license.
